1 Cardiomyocyte ploidy is dynamic during postnatal development and varies across genetic backgrounds

2

3 AUTHORS and AFFILIATIONS

4 Samantha K. Swift<sup>1</sup>, Alexandra L. Purdy<sup>1</sup>, Mary E. Kolell<sup>1</sup>, Michael A. Flinn PhD<sup>2,3</sup>, Caitlin Lahue<sup>4</sup>, Tyler Buddell

5 PhD<sup>1,2</sup>, Kaelin A. Akins<sup>1</sup>, Parker Foster<sup>1</sup>, Caitlin C. O'Meara PhD<sup>2,3</sup>, Christoph D. Rau, PhD<sup>4</sup>, Michaela

6 Patterson, PhD<sup>1,2\*</sup>

7

8 <sup>1</sup>Medical College of Wisconsin, Department of Cell Biology, Neurobiology, and Anatomy

9 <sup>2</sup>Medical College of Wisconsin, Cardiovascular Center

10 <sup>3</sup>Medical College of Wisconsin, Department of Physiology

11 <sup>4</sup>University of North Carolina School of Medicine, Department of Genetics

12

13 CONTACT INFO

14 \*Correspondence: [mpatterson@mcw.edu](mailto:mpatterson@mcw.edu)

15

## 16 SUMMARY

17 Somatic polyploidization, an adaptation by which cells increase their DNA content to support cell and organ  
18 growth, is observed in many mammalian cell types, including cardiomyocytes. Although polyploidization is  
19 beneficial in many contexts, progression to a polyploid state is often accompanied by a loss of proliferative  
20 capacity. Recent work suggests that heterogeneity in cardiomyocyte ploidy is highly influenced by genetic  
21 diversity. However, the developmental course by which cardiomyocytes reach their final ploidy state has only  
22 been investigated in select genetic backgrounds. Here, we assessed cardiomyocyte number, cell cycle activity,  
23 and ploidy dynamics across two divergent inbred mouse strains; C57Bl/6J and A/J. Both strains are born and  
24 reach adulthood with a comparable number of cardiomyocytes, however the end composition of ploidy classes  
25 and developmental progression to reach the final state and number differ substantially. In addition to  
26 corroborating previous findings that identified *Tnni3k* as a mediator of cardiomyocyte ploidy, we also uncover a  
27 novel role for *Runx1* and *Tnni3k* in ploidy dynamics and cardiomyocyte cytokinesis. These data provide novel  
28 insight into the developmental path to cardiomyocyte ploidy states and challenge the paradigm that  
29 polyploidization and hypertrophy are the only mechanisms for growth in the mouse heart after the first week of  
30 life.

## 31 KEYWORDS

32 Cardiomyocyte, somatic polyploidy, cytokinesis, endomitosis

## 33 INTRODUCTION

34 Somatic polyploidization, a cellular process resulting in the retention of multiple copies of the  
35 archetypal diploid genome, is a key component of development and organogenesis for many mammalian  
36 tissues, including the heart. Cardiomyocytes transition to a polyploid state beginning around birth, with the  
37 exact timing being species specific (Gan et al., 2020; Patterson and Swift, 2019). Polyploidization largely  
38 coincides with the shift from hyperplastic to hypertrophic growth of the myocardium (Soonpaa et al., 1996).  
39 While the exact function of somatic polyploidy in cardiomyocytes is still not fully understood, it has been  
40 implicated in energy preservation during rapid postnatal growth, maintenance of intercalated discs and the  
41 pseudosyncytium, establishment of greater force-generating muscle units, and terminal maturation (Orr-

Weaver, 2015; Patterson and Swift, 2019). Recent literature, links cardiomyocyte polyploidization with loss of myocardial regenerative competence (Gonzalez-Rosa et al., 2018; Han et al., 2020; Patterson et al., 2017). Insights into the developmental progression to cardiomyocyte polyploidy would improve our understanding of specific aspects of myocardial biology including total cardiomyocyte number, cell cycle potential in naïve and disease contexts, and capacity for myocardial regeneration.

Cardiomyocyte polyploidy arises via an alternative cell cycle known as endomitosis, in which cells replicate their genome without completing mitosis. Insights from mouse studies suggest cardiomyocyte polyploidization is tightly linked to cell cycle exit. For example, in the mouse, cardiomyocyte completion of cytokinesis rapidly declines within the first 1-2 days post birth and DNA synthesis during the first postnatal week largely contributes to cardiomyocyte polyploidization. Subsequently, additional DNA synthesis ceases around postnatal day (P) 10 at which point both the ploidy state of individual cardiomyocytes and the final number of cardiomyocytes are thought to be largely determined and constant (Alkass et al., 2015; Soonpaa et al., 1996; Soonpaa et al., 2015; Walsh et al., 2010). The timeline of cell cycle exit is further supported by the loss of cardiac regenerative capacity after P7 in mice (Porrello et al., 2011). Strikingly, ploidy in other cell types, such as hepatocytes, is not believed to be static as has been proposed in cardiomyocytes, but instead a fluid and dynamic state (Duncan, 2013).

Cardiomyocytes display diverse ploidy states. A single round of endomitosis results in cells with twice as much DNA (i.e. 4N), while a second round of endomitosis would produce 8N cells. Another layer of complexity arises from the stage at which a cardiomyocyte exits the cell cycle. Cardiomyocytes can exit the endomitotic cell cycle just prior to karyokinesis resulting in single nucleus, polyploid cells (1x4N, 1x8N, etc.). Conversely cardiomyocytes that successfully complete karyokinesis but fail to complete cytokinesis result in multinucleated cells with diploid nuclei (2x2N, 4x2N, etc.). In some cases, a combination of the two exit points ensues (2x4N, or Trinucleated 1x4N;2x2N). Together, these cell fate decisions contribute to a final composition of diverse ploidy classes, which display both inter- and intraspecies variation. For example, human cardiomyocytes are predominantly mononuclear and polyploid (Mollova et al., 2013) while murine cardiomyocytes are predominately binucleated (Soonpaa et al., 1996) and porcine cardiomyocytes can have upwards of 16 diploid nuclei (Velayutham et al., 2020). An interesting question that has arisen from the field is if the various ploidy classes bestow distinct attributes to the myocardium. Recent literature suggests that

72 having a higher proportion of mononuclear diploid cardiomyocytes (MNDCMs, 1x2N) is associated with greater  
73 regenerative competence, while polyploidy in cardiomyocytes impairs the proliferative response (Gonzalez-  
74 Rosa *et al.*, 2018; Han *et al.*, 2020; Hirose *et al.*, 2019; Patterson *et al.*, 2017). Beyond regeneration, the roles  
75 distinct ploidy classes play in cardiac homeostasis and pathophysiology remains largely unexplored.

76 Much of our understanding surrounding the timing and progression of polyploidy stems from work on  
77 mice and is limited to only a few strains. We recently determined that ploidy class ratios vary dramatically  
78 across inbred mouse strains, where some strains have a higher proportion of MNDCMs, while other strains  
79 display higher proportions of cardiomyocytes with  $\geq 8N$  DNA content (Patterson *et al.*, 2017). These findings  
80 suggest that genetics influence cardiomyocyte ploidy composition and raise the concern that our insights into  
81 polyploid progression and cardiomyocyte cell cycle dynamics may be hampered by only examining the process  
82 in select strains. We initiated the experiments described here hypothesizing that two strains of mice with  
83 divergent ploidy composition in adulthood arise at their terminal states via distinct approaches.

## 85 RESULTS

### 86 *Polyploidization of C57Bl/6J and A/J cardiomyocytes follow distinct developmental programs.*

87 We sought to characterize the progression of cardiomyocyte polyploidy from the early postnatal period  
88 through adulthood across two genetically and phenotypically divergent, inbred mouse strains, A/J and  
89 C57Bl/6J. These strains were selected based on Patterson *et al.*'s demonstration that A/J had 5-fold higher  
90 MNDCM content than C57Bl/6J at 6 weeks of age. First, we established the total number of cardiomyocytes in  
91 both C57Bl/6J and A/J ventricles at multiple time points, ranging from postnatal day 1 (P1) to 6 weeks of age  
92 (Figure 1A, and Supp Table 1). Cardiomyocytes were counted via hemocytometer and distinguished from non-  
93 cardiomyocytes by morphology and size. We found C57Bl/6J mice had a significant increase in the number of  
94 cardiomyocytes from P1 to P7 ( $P < 0.0001$ ), after which total cardiomyocyte number displayed minimal  
95 expansion ( $P = 0.077$  P7 to 6 week). This result is consistent with previous literature for C57Bl/6 mice (Alkass  
96 *et al.*, 2015; Soonpaa *et al.*, 2015) and suggests that some residual completion of the canonical mitotic cell  
97 cycle takes place after birth. Conversely, A/J ventricles demonstrated a slower, though still significant, initial  
98 increase in cardiomyocyte numbers in the week immediately following birth ( $P = 0.041$ ). Unlike C57Bl/6J mice,

99 a second significant increase in cardiomyocyte numbers occurred from P21 to 6 weeks in A/J mice ( $P = 0.036$ )  
100 (Figure 1A).

101 Alongside our assessment of total cardiomyocyte number, we examined the dynamics of  
102 polyploidization across the two strains from P7 through 6 weeks of age. In single cell suspensions generated  
103 from Langendorff digested ventricles we quantified various ploidy classes, including MNDCMs ( $2N - 1x2N$ ),  
104 tetraploid cardiomyocytes ( $4N - 1x4N$  and  $2x2N$ ), octoploid cardiomyocytes ( $8N - 1x8N$ ,  $2x4N$ , trinucleated –  
105  $1x4N + 2x2N$ , and tetranucleated –  $4x2N$ ), and a rare  $16N$  cardiomyocyte (Figure 1B-C). This analysis  
106 revealed that C57Bl/6J mice display a substantial increase in cardiomyocyte polyploidization from P7 to P14 at  
107 which point only 2.5% of cardiomyocytes remained mononuclear and diploid (Figure 1C-D). The vast majority  
108 of cardiomyocytes are  $4N$  by P7 and this ploidy class remains the majority at 6 weeks. Octoploid  
109 cardiomyocytes most strikingly increase in number during the second postnatal week (from P7 to P14),  
110 suggesting that a second round of endomitosis takes place during this time period. Very little change in ploidy  
111 states occurs after P14 beyond a gradual expansion of the  $8N$  population from P14 to 6 weeks ( $P=0.037$ )  
112 (Figure 1C, Supp Table 2). Meanwhile, A/J cardiomyocyte ploidy increased until P21 when frequency of a  
113 residual MNDCM population reached its lowest point and the frequency of the  $8N$  population its maximum  
114 (Figure 1C-D). Surprisingly, between P21 and 6 weeks of age the MNDCM population nearly doubled in size  
115 from 3.9% at P21 to 7.6% at 6 weeks ( $P=0.009$ ), a phenomenon which was not observed in C57Bl/6J (Figure  
116 1D). To narrow the window of when this expansion occurred, we added a 4-week-old collection timepoint with  
117 A/J mice, demonstrating that the increase of the MNDCM population largely took place during the 4<sup>th</sup> postnatal  
118 week of life. This expansion coincided with the second wave of increased cardiomyocyte numbers unique to  
119 A/J mice (Figure 1A). These observed cellular differences between strains did not impact heart weight nor  
120 heart-weight-to-body-weight ratios at the time points assessed (Supp Figure 1).

121 To identify an explanation for the robust expansion of MNDCMs after P21 in A/J mice, we assessed  
122 DNA synthesis via intraperitoneal (i.p.) injections of EdU at select timepoints throughout postnatal development  
123 and evaluated by *in situ* immunofluorescence (Figure 1E) one day following the final injection (Figure 1F). Both  
124 C57Bl/6J and A/J hearts displayed the highest level of DNA synthesis at P4. DNA synthesis reached near  
125 negligible levels in both strains by the 3<sup>rd</sup> postnatal week, consistent with past reports (Soonpaa *et al.*, 1996;  
126 Soonpaa *et al.*, 2015). At P7 and P10, A/Js showed significantly reduced numbers of EdU-positive

127 cardiomyocytes. This aligned with our observation of a slower increase in total cardiomyocyte number  
128 compared to C57Bl6Js (Figure 1A) and slower conversion to polyploid states (Figure 1C-D). When labeling in  
129 multiple-day increments from P21 onward, very few EdU-positive cardiomyocytes were identified in either  
130 strain (Figure 1F). Further, we detected no increase in DNA synthesis in A/J compared to C57Lb/6J during the  
131 3–4-week timepoint, suggesting the robust expansion of A/J cardiomyocytes observed between P21 and 4  
132 weeks could not be explained by traditional mitotic expansion of the MNDCM population.

### 133 134 *A/J cardiomyocytes display ploidy reversal following weaning.*

135 To investigate the expansion of MNDCM frequency in A/J mice between P21 and 6 weeks of age in the  
136 absence of new DNA synthesis, we quantified the completion of cytokinesis by a single cell suspension  
137 method in both A/J and C57Bl/6J mice (Figure 2A-C). Briefly, if a cardiomyocyte labeled with EdU is both  
138 mononuclear and diploid it is interpreted to have completed cytokinesis (Figure 2A, (Auchampach et al.,  
139 2022)). We used this logic to see if we could detect 1X2N EdU-positive cardiomyocytes at a timepoint after the  
140 observed MNDCM expansion at 6 weeks, which were not present at P21. To achieve this, we labeled  
141 cardiomyocytes with daily 10mg/kg injections of EdU from P14-20. Following EdU administration, we analyzed  
142 nucleation and ploidy of EdU-positive cardiomyocytes at two timepoints, P21 or 6 weeks of age by single cell  
143 suspension methods (Figure 2B-C). With this EdU regimen, P21 A/J ventricles displayed a slight reduction in  
144 the frequency of EdU-positive cardiomyocytes compared to C57Bl/6J ventricles (Figure 2D). This decreased  
145 EdU incorporation was not observed by *in situ* quantification methods with a similar injection strategy but is  
146 consistent with observations at other timepoints assessed *in situ* (i.e. P7 and P10, Figure 1F). In line with our  
147 previous data, and the current literature, C57Bl/6J mice had little to no EdU-positive MNDCMs at either the  
148 P21 or 6-week collection timepoint (Figure 2E), suggesting EdU injections in the 3<sup>rd</sup> postnatal week do not  
149 contribute to cell division. Instead, the vast majority of C57Bl/6J cardiomyocytes undergoing DNA synthesis  
150 during the 3<sup>rd</sup> postnatal week are becoming 8N (Figure 2F), likely arising from a 4N cell undergoing a second  
151 round of endomitosis. In contrast, Edu-positive MNDCMs can be found at both P21 and 6 weeks of age in A/J  
152 mice, suggesting some completion of cell division is still taking place. Most surprisingly, despite identical EdU  
153 injection regimens and random segregation of littermates across timepoints to avoid batch effects, we  
154 quantified a more than two-fold increase in EdU+ MNDCMs at the 6-week timepoint compared to P21 in A/J

155 hearts (~2.5% to ~6%,  $P=0.04$ , Figure 2E). These data imply that a portion of cardiomyocytes which underwent  
156 DNA synthesis during the 3<sup>rd</sup> postnatal week is not completing cytokinesis until after P21.

157 To refine which weeks of postnatal development were contributing to cardiomyocyte cytokinesis in A/Js,  
158 we conducted two additional cytokinesis experiments in A/J alone, labeling with EdU during earlier  
159 developmental timepoints either at the first (Experiment [Exp] #1) or the second (Exp #2) postnatal weeks,  
160 respectively, and assessing for cytokinesis at either P21 or 4 weeks (Supp Figure 2A). When labeling in the  
161 first week at P4 and P5, a similar phenotype was observed as with the third postnatal week labeling strategy:  
162 EdU-positive MNDCMs were more frequently identified at four weeks (3.03%) compared to P21 (1.18%) (Supp  
163 Figure 2B,  $P=0.001$ ). However, there were nominal numbers (<1%) of EdU-positive MNDCMs identified at P21  
164 and 4 weeks when labeling in the second postnatal week (Supp Figure 2D), indicating the DNA synthesis  
165 occurring during the second postnatal week primarily contributes to polyploidization of cardiomyocytes. More  
166 specifically, 80% of cardiomyocytes undergoing DNA synthesis in this second postnatal week are becoming  
167  $\geq 8N$  (Supp Figure 2E). This was a greater percentage of  $\geq 8N$  CMs than was seen with injection regimens at  
168 any other time point (Figure 2F, Supp Figure 2C).

169 Upon confirmation of cytokinesis in A/J mice, we attempted to elucidate which ploidy classes were most  
170 highly contributing to the expansion of total cardiomyocytes and the MNDCM ploidy class. To derive an  
171 estimate of the total number of cardiomyocytes in each ploidy class at each time point, the ploidy class  
172 percentages at P21, 4 and 6 weeks were multiplied by the total cardiomyocyte numbers at each respective  
173 time point (Figure 2G). With this calculation, we could again confirm that the 1X2N population had expanded  
174 from P21 to 4 weeks of age by a mean of ~64,000 CMs (Figure 2G-H,  $P<0.0002$ ). We also detected a  
175 significant increase in 2x2N population. As for populations that were decreasing over this same period, only the  
176 1x8N population reached statistical significance decreasing by ~24,000 cells between P21 and 4 weeks  
177 ( $P=0.002$ ), however other populations also decreased with less confidence, including the 1x4N (~26,000;  
178  $P=0.10$ ) and trinucleated, 1x4N + 2x2N populations (~12,000;  $P=0.08$ ) (Figure 2H). These results suggest that  
179 1x8N cardiomyocytes, and possibly additional polyploid populations, are contributing to the expansion of the  
180 MNDCM population, a possibility which would infer that “ploidy reversal” (Duncan et al., 2010) is taking place.

181 Past analysis from just one or two mouse strains, including C57Bl/6, has suggested that cardiomyocyte  
182 ploidy is largely static after about P14. Our detailed analysis presented here suggest a much more dynamic

183 process in A/J hearts, whereby a subset of cardiomyocytes which undergo DNA synthesis in the first postnatal  
184 week and again in the third postnatal week, complete cytokinesis sometime after weaning, a possibility which  
185 would be indicative of the ploidy conveyor model put forth by the hepatocyte field. Mathematically, this could  
186 add up as well. If an 8N cell is capable of reverting to a 2N state through multipolar spindles (Duncan *et al.*,  
187 2010), it would generate up to 4 new daughter cells in the process. Therefore, our ~24,000 1X8N cells would  
188 become 96,000 1X2N. It remains possible that other reversion combinations also ensue. For example, perhaps  
189 some of the 8N cells only revert to a 4N state this would explain why we see such a prominent 4N population in  
190 the single cell EdU analysis (Figure 2F, and Supp Figures 2C and 2E).

191 *Tnni3k hypomorphism is partially responsible for ploidy dynamics.*

192 We next began to explore possible mechanisms for this unique and dynamic ploidy phenotype  
193 observed in A/J mice. A/J mice harbor a naturally occurring hypomorphic mutation in the gene *Tnni3k* (Wheeler  
194 *et al.*, 2009), while C57Bl/6J carry the “wild-type” variant. Utilizing an engineered knockout allele of *Tnni3k*  
195 maintained on a C57Bl/6J inbred background, Patterson *et al.* (2017) previously established that genetic  
196 ablation of *Tnni3k* contributes to MNDCM frequency. Specifically, *Tnni3k* knockout mice displayed a MNDCM  
197 frequency of 5.3% in early adulthood compared to just 1.5% in controls (Patterson *et al.*, 2017). Additional loss-  
198 of-function alleles of *Tnni3k* have yielded similar results (Gan *et al.*, 2021; Gan *et al.*, 2019). Knowing that  
199 *Tnni3k* partially contributed to the end-state frequency of MNDCMs, we hypothesized that *Tnni3k* also plays a  
200 role in the ploidy dynamics observed after P21 in A/J mice. To test this, we followed *Tnni3k* global knockout  
201 mice (*Tnni3k*<sup>-/-</sup>) compared to wildtype littermates (*Tnni3k*<sup>+/+</sup>) maintained on a C57Bl/6J background for ploidy  
202 composition (Figure 3A) and total cardiomyocyte numbers (Figure 3B). At P21, MNDCM frequency was not  
203 different across genotypes, both fell below 2% (Figure 3A). From 3-6 weeks of age, *Tnni3k*<sup>+/+</sup> MNDCM  
204 numbers stayed constant around 1-1.5%. However, MNDCM frequency in *Tnni3k*<sup>-/-</sup> mice gradually increased  
205 over this same time course (P=0.02). At early adulthood, *Tnni3k* knockout mice had three times more  
206 MNDCMs than wildtype littermates (P=0.009), but this was still 3-fold less than typically observed in A/J mice,  
207 consistent with previous reports. Total cardiomyocyte number did not increase between P21 and 6-week  
208 timepoints in knockout animals, nor did it differ across genotypes (Figure 3B). When we repeated the  
209 experiment from Figure 2B (daily EdU injections from P14-P20) in these animals, there were fewer total EdU-  
210 positive cardiomyocytes in *Tnni3k*<sup>-/-</sup> mice (Figure 3C, P=0.0006), consistent with what we observed in A/Js by



211 this same method (Figure 2D). Strikingly, at 6 weeks, we saw significantly more EdU-positive MNDCMs in  
212 *Tnni3k*<sup>-/-</sup> compared to *Tnni3k*<sup>+/+</sup> mice (Figure 3D, P=0.0071). However, comparing *Tnni3k*<sup>-/-</sup> 6-week  
213 preparations to P21, we observed only a trending increase in EdU-positive MNDCMs (Figure 3D). Further, the  
214 frequency of EdU-positive MNDCMs were even more rare than observed in A/J with this same injection  
215 regimen (Figure 2E). Taken together, these data suggest that *Tnni3k* hypomorphism is only partially  
216 responsible for the ploidy phenotypes observed in A/J mice.

### 217 218 *A genetic locus, including Runx1, associates with MNDCM frequency*

219 To identify additional genetic contributors to ploidy dynamics observed in A/J mice, we returned to the  
220 genome-wide association study (GWAS) which mapped frequency of mononuclear cardiomyocytes across the  
221 hybrid mouse diversity panel (HMDP) published by ((Patterson *et al.*, 2017). With any genetic resource,  
222 including the HMDP, relevant genetic loci may be masked by complex gene-gene interactions including  
223 additive, suppressive, or epistatic relationships. Within the HMDP there are 4 panels of recombinant inbred (RI)  
224 strains: BXD (C57Bl/6J x DBA/2J), AXB/BXA (A/J x C57Bl/6J, and vice versa), BXH (C57Bl/6J X C3H/J), and  
225 CXB (Balb/cJ X C57Bl/6J); inclusion of any one of the RI panels could suppress or washout a relevant locus.  
226 With this logic, we re-ran the original phenotypic data, frequency of mononuclear cardiomyocytes across 120  
227 strains, but excluded the BXD panel (44 strains), and a locus on chromosome (Chr) 16 rose in significance  
228 (Figure 4A versus Figure 4B (Patterson *et al.*, 2017)). With the BXD panel removed, the AXB/BXA RI panel  
229 makes up 35% of the remaining data (27 AXB/BXA strains of 76 total remaining strains after BXDs have been  
230 removed); thus, it is a major contributor to the statistical significance. Interestingly, when the AXB/BXA panel is  
231 instead removed from the phenotype data, the locus is completely lost (Figure 4C). Taken together, these  
232 observations indicate that the Chr16 locus associated with the frequency of mononuclear cardiomyocytes was  
233 dependent on polymorphisms between A/J and C57Bl/6J.

234 Based on criteria set by (Wang *et al.*, 2016) for determining locus range, the identified Chr16 locus  
235 spans approximately 4.2 mega base pairs (Mbps): 89,459,997 *Tiam* – 93,665,575 *Dop1b*. In another study  
236 using the HMDP, we used reduced representational bisulfite sequencing to identify changes to CpG  
237 methylation sites that affect cardiac phenotypes. Using the same BXD-removed data which identify the  
238 genomic locus, we performed an epigenome-wide association study (EWAS) and identified a locus-wide

239 significant ( $P=3.9E-4$ ) association between the methylation status of a CpG within the locus and the percent  
240 mononuclear cardiomyocytes. Leveraging the significantly smaller block sizes of EWAS loci (Orozco et al.,  
241 2015), we were able to narrow down the Chr16 locus further to approximately 92,763,000 – 93,665,500. Within  
242 this refined locus are only six protein coding genes: *Runx1*, *1810053B23Rik*, *Setd4*, *Cbr1*, *Cbr3*, and *Dop1b*.  
243 Of these six genes, we identified *Runx1* as an interesting candidate as it has been used as a marker of  
244 cardiomyocyte regression to a less differentiated state prior to cell cycle re-entry (D'Uva et al., 2015; Kubin et  
245 al., 2011). In addition, *Runx1* has been shown to interact with Yap (Chuang and Ito, 2021), a transcription  
246 factor well established for its regulation of cardiomyocyte proliferation (Monroe et al., 2019). With this in mind,  
247 we first asked if *Runx1*-positive cardiomyocytes were more prevalent in A/J versus C57Bl/6J hearts at P21, just  
248 preceding expansion of the MNDCM population in A/Js. Knowing that DNA synthesis was not different across  
249 strains at this timepoint, we instead combined *Runx1* antibody stain with a more general cell cycle marker,  
250 Ki67 (Figure 4D). Interestingly, A/J ventricles not only displayed almost 3-fold more *Runx1*-positive  
251 cardiomyocytes than C57Bl/6J ventricles (Figure 4E), but *Runx1*-positive cardiomyocytes in A/J ventricles were  
252 more frequently double positive for Ki67 than C57Bl/6J cardiomyocytes (Figure 4F). Very few *Runx1*-positive  
253 Ki67-negative cardiomyocytes were found in either strain and there was no difference across genotypes in this  
254 population (Figure 4G).

255

256 *Runx1* overexpression is sufficient to induce cytokinesis and expansion of the MNDCM population in C57Bl/6J

257 To directly test *Runx1*'s ability to induce A/J-like phenotypes in C57Bl/6J mice, we utilized a conditional  
258 overexpression allele whereby *Runx1* cDNA preceded by a *LoxP-STOP-LoxP* cassette was inserted into the  
259 ubiquitous *Rosa26* locus [*Gt(Rosa)26<sup>tm1(RUNX1)Mα</sup>*, referred to throughout as *Runx1<sup>OE</sup>*] (Qi et al., 2017; Yzaguirre  
260 et al., 2018). When crossed to the *Myh6-MerCreMer* driver (JAX Stock 011038), these mice overexpress  
261 *Runx1* only in cardiomyocytes following tamoxifen induction. Both alleles have been backcrossed and  
262 maintained on a C57Bl/6J background in our laboratory. Mice with a single copy of the *Runx1* transgene were  
263 crossed to mice with two copies of the *Cre* transgene, resulting in litters with either *Myh6-MerCreMer<sup>+/-</sup>* only  
264 (Ctrl) or *Myh6-MerCreMer<sup>+/-</sup>; Rosa26<sup>tm1(RUNX1)Mα</sup>* (*Runx1<sup>OE</sup>*). All animals received tamoxifen, which was  
265 administered with two subcutaneous injections at P0 and P1 (Figure 4H). With this injection regimen, we  
266 observed that most cardiomyocytes expressed *Runx1* (Supp Figure 4A). Animals were also injected with EdU

267 at P4 and P5 and hearts were collected at 4 weeks of age as a single cell suspension for nucleation and ploidy  
268 analysis (similar to Exp #1, Supp Figure 2A). First, considering all cardiomyocytes regardless of EdU status,  
269 *Runx1*<sup>OE</sup> mice displayed twice as many MNDCMs compared to Ctrl control littermates (Figure 4I). There was  
270 no measurable change in the number of EdU-positive cardiomyocytes with this injection regimen (Supp Figure  
271 4B), however we did observe a significant increase in the number of EdU-positive cardiomyocytes MNDCMs,  
272 suggesting they had completed cytokinesis (P=0.002, Figure 4J). Further, this resulted in a trending increase in  
273 total cardiomyocyte number, from 1.66M in Ctrl hearts to 2.08M in *Runx1*<sup>OE</sup> hearts (P=0.08, Figure 4J). Taken  
274 together, these data indicate that *Runx1* is sufficient to induce A/J-like ploidy phenotypes in C57Bl/6J mice.

275  
276 *Single nucleus RNA sequencing characterizes distinct cardiomyocyte subpopulations for C57Bl/6J and A/J*  
277 *mice just prior to ploidy reversal*

278 To identify and characterize the subpopulation of cardiomyocytes uniquely primed to expand within A/J  
279 hearts, we performed single nucleus RNA sequencing on 56,661 nuclei isolated from P21 hearts, just prior to  
280 the reversal event. Several past studies have enriched for cardiomyocyte nuclei by staining and sorting for  
281 *Pcm1*-positive nuclei prior to performing transcriptomics, however we have observed that as many as 13.0+/-  
282 2.6% of adult A/J cardiomyocyte nuclei do not exhibit the classic perinuclear staining pattern and that there  
283 may be differential localization across ploidy classes (Supp Figure 5A-B). Therefore, we avoided using this  
284 enrichment strategy, and instead relied on post hoc gene expression to identify cardiomyocytes. We captured  
285 28,070 total nuclei from 6 pooled C57Bl/6J hearts and 28,591 nuclei from 6 pooled A/J hearts. A median of 903  
286 genes were mapped to each nucleus. Datasets were integrated from all samples using Seurat (Hao et al.,  
287 2021) and PHATE cell-type clustering (Moon et al., 2019) was subsequently run collectively, identifying 30  
288 distinct clusters within the parent sample (Figure 5A). Individual cell types were identified by PHATE DimPlot  
289 ((Moon *et al.*, 2019), Figure 5B) and further confirmed based on the top defining genes for each cluster. From  
290 this analysis clusters 7, 14, 21, and 24 were confidently identified as cardiomyocytes. These four clusters  
291 underwent doublet discrimination (McGinnis et al., 2019) and from this, 7,632 cardiomyocytes (4,240 C57Bl/6J  
292 and 3,392 A/J) were reclustered by Seurat (Hao *et al.*, 2021), resulting in 12 cardiomyocyte clusters (Figure  
293 5C). All 12 clusters express classic cardiomyocyte markers, including *Tnni3*, *Myh6*, and *Tnnt2*, (Supp Figure  
294 5C).

295 To generally classify each cardiomyocyte cluster, we identified significantly enriched or depleted genes  
296 in each cluster (FDR-corrected  $P < 0.01$ , 1.25-fold change, Figure 5D). The cluster-specific enriched genes  
297 ( $P < 0.01$ , 1.5-fold change) were then also run through Panther Gene Ontology (GO) analysis (Figure 5E,  
298 (Thomas et al., 2022)). The majority of cardiomyocyte nuclei fell in clusters 0, 1, and 2, which were largely  
299 characterized by maturation processes like sarcomere organization, filament assembly and sliding,  
300 mitochondrial distribution, calcium ion signaling, and contraction-relaxation. Clusters 4 (301 nuclei) and 8 (106  
301 nuclei) were predominantly derived from C57Bl/6J hearts, while Cluster 10 (56 nuclei) was identified as being  
302 almost exclusively A/J (Figure 5F, Supp Figure 5D).

303 We first attempted to determine if any cluster was predicted to be in the cell cycle. Tricycle analysis  
304 (Zheng et al., 2022) identified only one cluster, Cluster 9 ( $P = 3.36E-04$ ), however this cluster appears to be  
305 defined by many genes traditionally associated with leukocyte lineages (*Cyth4*, *Fyb*, and *Csf1r*, Figure 5D) and  
306 thus may represent a cluster of doublets that did not reach doublet cutoff criteria. Having not identified any  
307 clusters considered to be “cycling” by traditional means, we instead looked for gene expression overlap with  
308 cluster “CM4” from Cui et al. (2020) which identified CM4 as being a proliferative population unique to  
309 regenerative hearts (Cui et al., 2020). Notably, only two clusters from our data, Clusters 4 and 8, were  
310 identified as being significantly enriched for genes upregulated in Cui et al CM4 and significantly depleted for  
311 genes downregulated in Cui et al. CM4 (Figure 5F). Cluster 10, predominantly made up of A/J cardiomyocytes,  
312 was also significantly enriched for genes upregulated in Cui et al. CM4, but the depletion of downregulated  
313 genes was just above our FDR-corrected p-value range ( $P = 0.059$ ).

314 As we were interested in identifying a cluster unique to A/J hearts, we further investigated Cluster 10.  
315 We ran genes that were enriched in Cluster 10 relative to other cardiomyocyte clusters (96 genes,  $P < 0.01$ , 1.5-  
316 fold different from other clusters) through Ingenuity Pathways Analysis (IPA, Qiagen) and identified upstream  
317 regulators of gene networks. The top 5 predicted activated upstream regulators were *Tead1*, D-glucose, *Erg*,  
318 *Esrra*, and *Cebpb*, while *Rictor*, *Mycn*, *NR4A1*, miR-29b-3p (and other miRNAs with AGCACCA seed  
319 sequence), and *Foxo3* were predicted upstream regulators of inhibited gene networks (Figure 5G). The  
320 activated pathways are particularly interesting as *Tead1* is a transcription factor activated by Yap binding (Flinn  
321 et al., 2020). *Erg* is a ETS-family of transcription factor, and *Erg* and *Runx1* pathways are highly integrated in  
322 hematopoietic biology (Martens et al., 2012). In a recent study, both *Tead1* and *Erg* (ETS) binding motifs were

323 identified by a Runx1 chromatin-immunoprecipitation (Gilmour et al., 2018), suggesting possible interactions  
324 between Runx1 and these transcription factors at their respective canonical DNA binding sites. Finally, *Cebpb*  
325 is considered a master regulator of cardiac hypertrophy (Bostrom et al., 2010), and has been linked to *Runx1*  
326 in both dorsal root ganglia (Ugarte et al., 2012) and early hematopoiesis (Lichtinger et al., 2012). Thus, at least  
327 3 of the top five activated pathways are linked to *Runx1*. *Runx1* itself is also weakly identified by IPA upstream  
328 regulator analysis of cluster 10 defining genes ( $P=0.02$ ) though directionality is not predicted.

## 329 330 DISCUSSION

331 We initiated the current study with the goal of determining if mice with divergent cardiomyocyte ploidy  
332 distribution in adulthood arrive at these end states via distinct developmental pathways. In line with previously  
333 published literature (Alkass *et al.*, 2015; Soonpaa *et al.*, 2015), we confirmed that C57Bl/6J cardiomyocytes  
334 reach their terminal composition in a linear manner. By P14, cell cycle activity in C57Bl/6J cardiomyocytes is  
335 largely complete, and ploidy remains static thereafter. In contrast, A/J mice achieve their end state by a much  
336 more dynamic process. A/J cardiomyocyte polyploidy peaks around P21, after which there is a substantial  
337 expansion of the 1x2N population. Between P21 and 6-weeks of age, ploidy equilibrates, and A/J hearts arrive  
338 at their final adult frequency of MNDCMs which is more than 5x higher than observed in C57Bl/6J hearts.  
339 Concomitant with this expansion of MNDCMs in A/J, there is an increase in total cardiomyocyte numbers not  
340 observed in C57Bl/6J. Using single cell suspension methods paired with EdU labeling, we were able to identify  
341 delayed cytokinetic events in A/J, which again were not observed in C57Bl/6J. Further, there was a quantifiable  
342 decrease in polyploid cardiomyocytes, suggesting the expanding MNDCM pool is arising from a polyploid  
343 source. We believe this to be the first observation of ploidy reversal in cardiomyocytes, a phenomenon first  
344 reported in the liver field (Duncan *et al.*, 2010). The divergent processes observed when comparing two inbred  
345 mouse strains suggest a knowledge gap remains regarding cardiomyocyte polyploidization and maturation,  
346 necessitating further experimentation on the unique phenotypic and genetic profiles across strains.

347 Through our examination of this MNDCM expansion unique to A/J hearts, we did not detect measurable  
348 amounts of DNA synthesis after P21, suggesting MNDCM expansion was not achieved through canonical  
349 mitotic means (i.e. a residual MNDCM population simply proliferated through the traditional mitotic cell cycle),  
350 but rather cell cycle completion from a pre-existing polyploid cell occurred. This led us to investigate the

351 potential for delayed cytokinesis. Some have reported a synchronous proliferative burst of cardiomyocytes  
352 restricted to a narrow window of time during postnatal development (Naqvi et al., 2014). While we did not  
353 observe such an expansion of cardiomyocytes in C57Bl/6J, it remains possible that we missed an equivalent  
354 narrow window of cell cycle activity in A/J due to our experimental design.

355 The evaluation of cytokinesis is limited by insufficient available experimental strategies (Auchampach *et*  
356 *al.*, 2022). Traditional markers, like Aurora Kinase B (AKB) notoriously localize to the midbody in both  
357 cardiomyocytes undergoing cytokinesis and those that ultimately fail to complete cytokinesis and become  
358 multinucleated instead (Engel et al., 2006; Leone et al., 2018). Thus, on its own AKB does not distinguish  
359 cytokinesis. Other strategies like the *Mosaic Analysis with Double Markers* (MADM) mouse (Ali et al., 2014)  
360 and sparse labeling followed by clonal analysis have been successfully used by several groups to confirm cell  
361 division (Bradley et al., 2021; Liu et al., 2021), but require engineered alleles to be bred into the experimental  
362 model. This was not practical in our case where we hoped to compare two divergent genetic backgrounds. We  
363 instead employed a universally applicable strategy, which combines EdU labeling with Langendorff single cell  
364 suspensions. With this method we were able to identify cells that had definitively completed cytokinesis in A/J  
365 hearts by 4 or 6 weeks, which were not present at P21. Further, this methodology allowed us to powerfully  
366 examine other ploidy classes and infer ploidy dynamics, which could not be explored by any of the histological  
367 methods described above. Admittedly, analysis of the ploidy classes by our method is largely based on ratios,  
368 and we have not excluded the potential of cell death within specific cardiomyocyte classes which would shift  
369 these ratios. However, a general increase in the number of total cardiomyocytes after P21 indicates that this  
370 possibility is unlikely.

371 Our analysis of genetically divergent inbred mouse strains in a controlled laboratory setting suggests a  
372 genetic component to the regulation of polyploidization. We sought multiple strategies to identify possible  
373 mechanisms. First, a previously performed GWAS on frequency of mononuclear cardiomyocytes (Patterson *et*  
374 *al.*, 2017) provided a source of potential candidates that may reciprocally influence the unique developmental  
375 ploidy dynamics observed in A/J mice. *Tnni3k*, arising from this GWAS, has a naturally occurring  
376 polymorphism and has been previously demonstrated to control the size of the MNDCM population (Patterson  
377 *et al.*, 2017). The variant is an alternative donor “G” four base pairs away from the consensus exon 19-20  
378 splice site, resulting in a frame shift and premature stop codon (Wheeler *et al.*, 2009). Ultimately, this mutation

379 acts as a hypomorphic allele, and is carried by A/J mice, while C57Bl/6J carry the wild-type “A” at this locus.  
380 Here, we show that a genetically engineered loss-of-function mutation on the C57Bl/6J background partially  
381 phenocopies A/J cardiomyocyte ploidy progression. We see similar expansion of the MNDCM population  
382 between P21 and 6 weeks, as well as reduced DNA synthesis, and increased completion of cytokinesis post  
383 wean. However, the phenotypes in the engineered *Tnni3k* null C57Bl/6J mice are modest in comparison to A/J,  
384 suggesting polygenic contribution.

385 A second locus from the GWAS on Chr16 included *Runx1*, which has been implicated in the reversion  
386 of cardiomyocytes to a less differentiated state (D'Uva *et al.*, 2015; Kubin *et al.*, 2011; Zhang *et al.*, 2016).  
387 Unlike *Tnni3k*, no obvious protein coding mutations distinguishing A/J from C57Bl/6J mice within this gene. We  
388 employed epigenome-wide association analysis to identify differential methylation status within the Chr16 locus  
389 and found that the *Runx1* transcriptional start site was differentially methylated between the two strains  
390 prompting us to select *Runx1* as a candidate gene in the locus. Indeed, we found more cardiomyocytes  
391 expressing *Runx1* in A/J compared to C57Bl/6J hearts at P21. Overexpression of *Runx1* in a C57Bl/6J  
392 background demonstrates that *Runx1* expression alone is sufficient to induce A/J-like cardiomyocyte ploidy  
393 phenotypes on the C57Bl/6J genetic background. These observations could prompt exploration of the role of  
394 *Runx1* in regeneration contexts. It is worth noting, however, that while we landed on *Runx1* from the Chr16  
395 locus for a variety of reasons, there are 38 protein coding genes within the 4.2Mbps locus, and four other  
396 genes within the locus have protein coding variants between A/J and C57Bl/6J: *Ifnar1*, *Gart*, *Son*, and *Setd4*.  
397 Of the four genes, only the variant of *Setd4* is predicted to be “possibly damaging” by PolyPhen (Adzhubei *et*  
398 *al.*, 2010) and SIFT (Ng and Henikoff, 2001) while the others are predicted to be benign. It remains possible  
399 that *Setd4* is a gene worth exploring in this context.

400 Finally, we performed single nucleus transcriptomic analysis in attempt to identify a unique  
401 subpopulation of cardiomyocytes in A/J hearts that might represent a population capable of ploidy reversal.  
402 While we cannot be certain that Cluster 10 represents the unique population responsible for the observed  
403 ploidy reversion, it did unveil molecular pathways which appear to be uniquely activated in a subset of A/J  
404 cardiomyocytes. *Tead*, the top hit to come from this analysis, is quite striking as an established effector of the  
405 Hippo-Yap pathway (Flinn *et al.*, 2020) and cardiomyocyte proliferation (Monroe *et al.*, 2019). *Tead*, along with  
406 2 other identified pathways, *Erg* and *Cebpb*, interact with *Runx1* in other cell types (Gilmour *et al.*, 2018;

Lichtinger *et al.*, 2012; Ugarte *et al.*, 2012) lending support to the hypothesis that endogenous Runx1 expression in A/J hearts contributed to cardiomyocyte ploidy phenotypes. Further exploration of these pathways in conjunction with one another is warranted.

The function of polyploidization in cardiomyocytes remains unclear. Some have suggested developmental polyploidization, through the increase in total cellular DNA, supports enhanced rates of biosynthesis for production of contractile apparatus. Others hypothesize it promotes cell cycle exit as a strategy for both energy preservation and for preventing the disassembly of the pseudosyncytium inherent to cell division. In disease contexts, many in the field postulate that MNDCMs are uniquely capable of mounting a regenerative response based on the observation that polyploidization coincides with loss of regenerative competence. This hypothesis is supported by several recent studies where ploidy phenotypes were manipulated or altered and regeneration in turn was impacted (Gonzalez-Rosa *et al.*, 2018; Han *et al.*, 2020; Hirose *et al.*, 2019; Patterson *et al.*, 2017). Additionally, high levels of polyploidy have been observed in various cardiomyopathies and heart failure (Beltrami *et al.*, 1997; Brodsky *et al.*, 1994; Gilsbach *et al.*, 2018). Despite these numerous studies, further work is warranted to determine what effect either blocking or driving the polyploidization process has on heart function. Understanding the genetic mechanisms that regulate polyploidization may help us better understand its role in normal cardiac physiology, myocardial regeneration, and heart failure.

## ACKNOWLEDGEMENTS

We thank Dr. Miao Cui for sharing her gene list from CM4. This work was supported by the American Heart Association, 18CDA34110240 awarded to M.P., and the National Institutes of Health, F31HL162468 awarded to S.K.S, R01HL155085 awarded to M.P., F32HL150958 awarded to M.A.F, R01HL141159 awarded to C.C.O, and R00HL138301 awarded to C.D.R.

## AUTHOR CONTRIBUTIONS

Conceptualization, S.K.S., A.L.P., C.C.O, C.D.R., M.P.; Methodology, S.K.S., M.A.F., C.D.R., M.P.; Investigation, S.K.S., A.L.P., M.E.K., M.A.F., C.L., T.B., K.A.A., P.F., C.D.R., M.P.; Writing – Original Draft,



434 S.K.S., C.D.R., M.P.; Writing – Review & Editing, S.K.S., A.L.P., M.A.F., T.B., K.A.A., P.F., C.C.O., C.D.R.,  
435 M.P.; Funding Acquisition, S.K.S., M.A.F., C.C.O., C.D.R., M.P.; Supervision, C.C.O., C.D.R., M.P.

436

437 DECLARATION OF INTERESTS

438 The authors declare no completing interests.

439

440

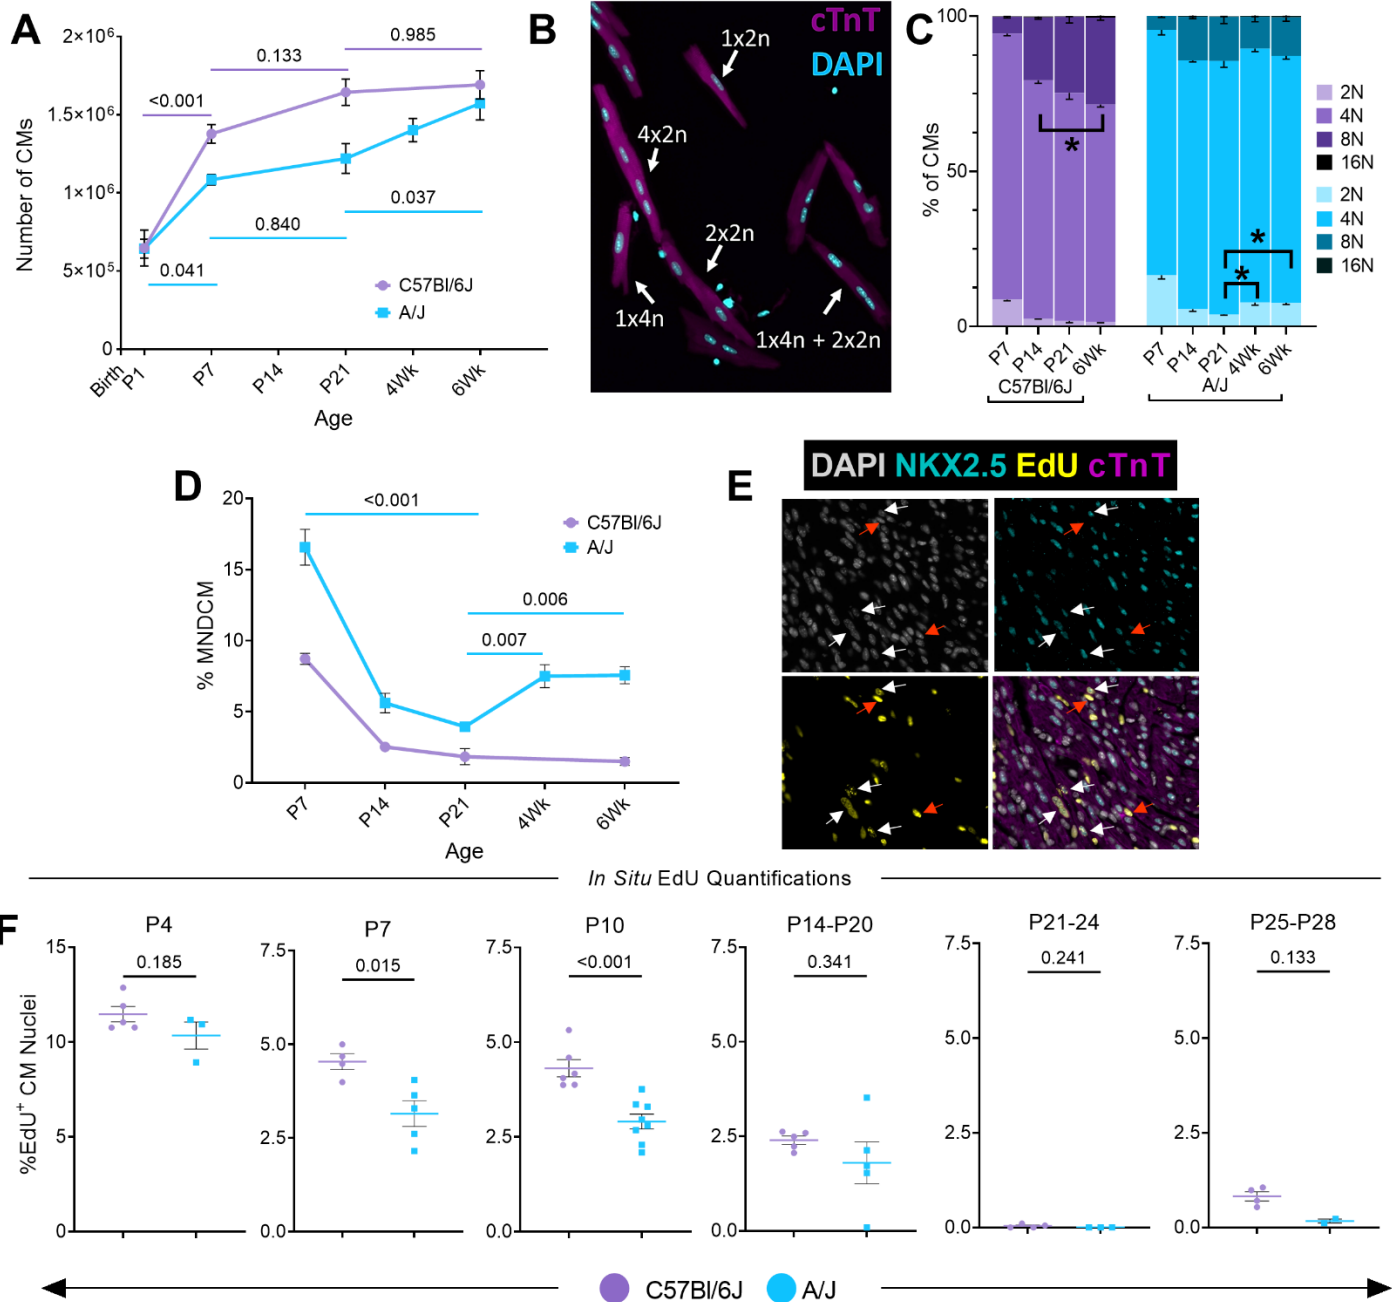

442

443 **Figure 1. Developmental progression of polyploidy across to genetically divergent mouse strains. (A)**

444 Number of cardiomyocytes counted via hemocytometer after Langendorff dissociation over multiple timepoints  
445 from P1 to 6 weeks in C57Bl/6J (purple) and A/J mice (blue) (N=6-14). Complete breakdown of data and  
446 statistical comparisons can be found in Supp Table 1. **(B)** Single-cell ventricular suspension stained for cardiac

447 troponin T (cTnT) (magenta) and DAPI (cyan). Identified cardiomyocyte ploidy classes labeled on the image.  
448 **(C)** Quantification of 2N (1x2N), 4N (sum of 1X4N and 2x2N populations), 8N (sum of 1x8N, 2x4N, Tri: 1X4N +  
449 2x2N, and 4x2N populations), and 16N (sum of 1X16N, 2x8N, Tri: 1X8N + 2x4N, and 4x4N populations) ploidy

450 classes at multiple timepoints from P7 to 6 weeks in C57Bl/6J and A/J mice (N=3-9). \* indicates  $p < 0.05$  for  
451 select comparisons; complete statistical comparisons can be found in Supp Table 2. **(D)** Percent mononuclear  
452 diploid cardiomyocytes (MNDCMs) extracted from Figure 1C (N=3-9). **(E)** Representative image of  
453 cardiomyocyte DNA synthesis measured *in situ* with DAPI (grey), NKX2.5 (cyan), EdU (yellow), and cTnT  
454 (magenta). White arrows indicated EdU, NKX2.5-double positive cardiomyocyte nuclei, red arrows are EdU-  
455 positive NKX2.5-negative non-cardiomyocyte nuclei. **(F)** Quantification of the percentage of EdU, NKX2.5-  
456 double positive nuclei as a percent of total NKX2.5-positive cardiomyocyte nuclei in the left ventricle in both  
457 strains across multiple timepoints. Timepoints above each graph indicate the time of the EdU injection. Tissue  
458 was collected 24 hours after last injection.

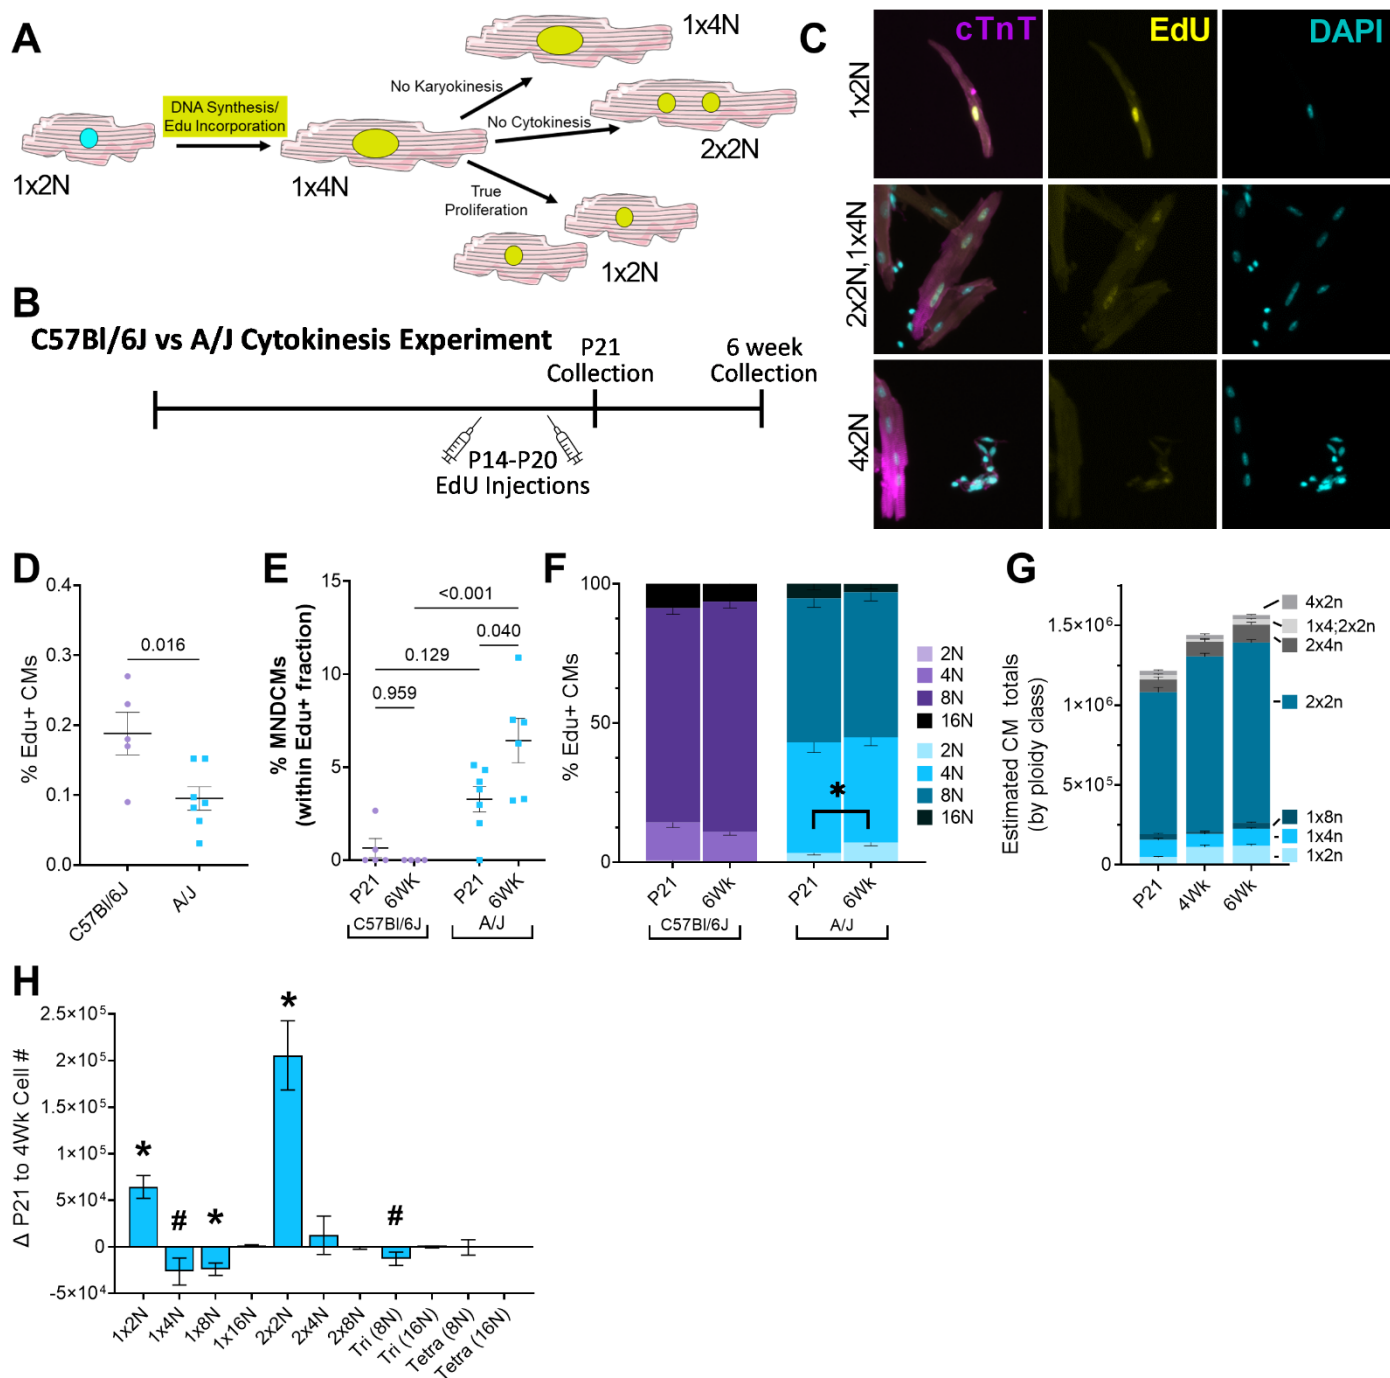

459

460 **Figure 2. A/J cardiomyocytes undergo a cytokinetic event after P21 resulting in expansion of the**  
 461 **MNDCM population. (A)** Schematic depicting possible outcomes after EdU labeling. EdU-positive  
 462 cardiomyocytes can only become mononuclear and diploid if cytokinesis was successfully completed. **(B)**  
 463 Timeline of EdU injections and cell collection timepoints. **(C)** Representative images of single cell ventricular  
 464 suspensions stained for cTnT (magenta), EdU (yellow), and DAPI (cyan). Tri- and tetranucleated  
 465 cardiomyocytes are used to normalize DAPI fluorescence intensity. Top: EdU-positive MNDCM (1x2N); middle:  
 466 EdU-positive trinucleated cardiomyocyte (2x2N; 1x4N); and bottom: EdU-negative tetranucleated

467 cardiomyocyte (4x2N). **(D)** Quantification of total EdU-positive cardiomyocytes following EdU administration  
468 outlined in Figure 2B represented as a percent of total cardiomyocytes. Assessed at P21 collection timepoint.  
469 **(E)** Quantifications of EdU-positive MNDCMs as a percent of total EdU-positive cardiomyocytes across both A/J  
470 and C57Bl/6J at P21 and 6 weeks. **(F)** Quantifications of EdU+ cardiomyocytes broken down into total DNA  
471 content (i.e. 2N, 4N, 8N, or 16N). **(G)** Estimated total number of cardiomyocytes in A/J for each ploidy class.  
472 Calculations were determined by multiplying the total number of cardiomyocytes (Figure 1A) by the percentage  
473 of each ploidy class (Figure 1C) at P21, 4, and 6 weeks. **(H)** Delta change between P21 and 4 weeks in  
474 cardiomyocyte number within each ploidy class. \* indicates  $P < 0.05$ ; # indicates  $P \leq 0.1$ .

475

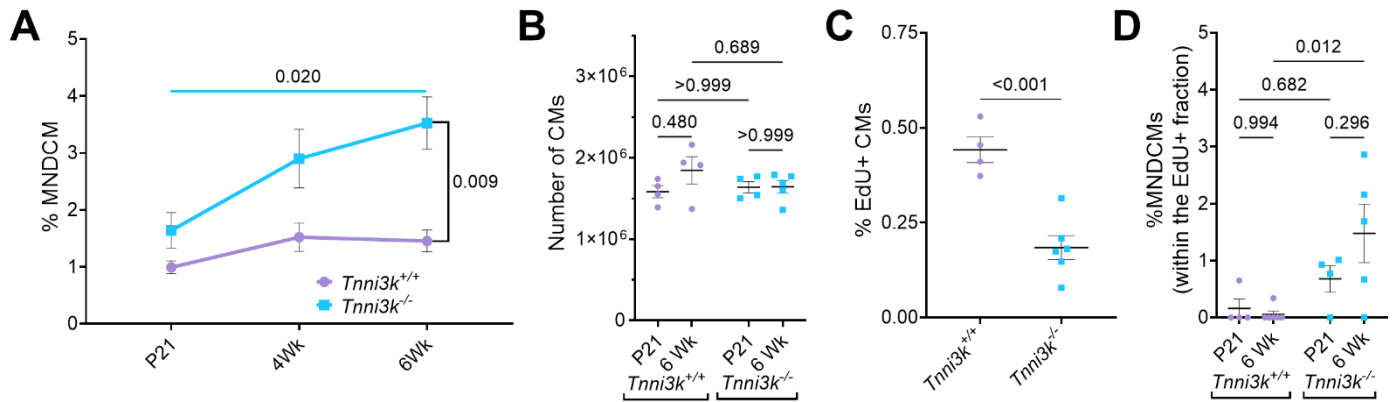

476

477

478

479

480

481

482

**Figure 3. *Tnni3k* ablation in C57Bl/6J partially phenocopies A/J ploidy dynamics. (A)** Percent MNDCM over time in *Tnni3k*<sup>-/-</sup> vs *Tnni3k*<sup>+/+</sup> (maintained on a C57Bl/6J background). **(B)** Number of cardiomyocytes counted via hemocytometer after Langendorff dissociation at P21 and 6 weeks (N=4-5). **(C)** Percent EdU+ cardiomyocytes at P21 following P14-P20 daily EdU injections. **(D)** Quantifications of EdU-positive MNDCMs represented as a percent of total EdU-positive cardiomyocytes in *Tnni3k*<sup>-/-</sup> and *Tnni3k*<sup>+/+</sup> at P21 and 6 weeks.

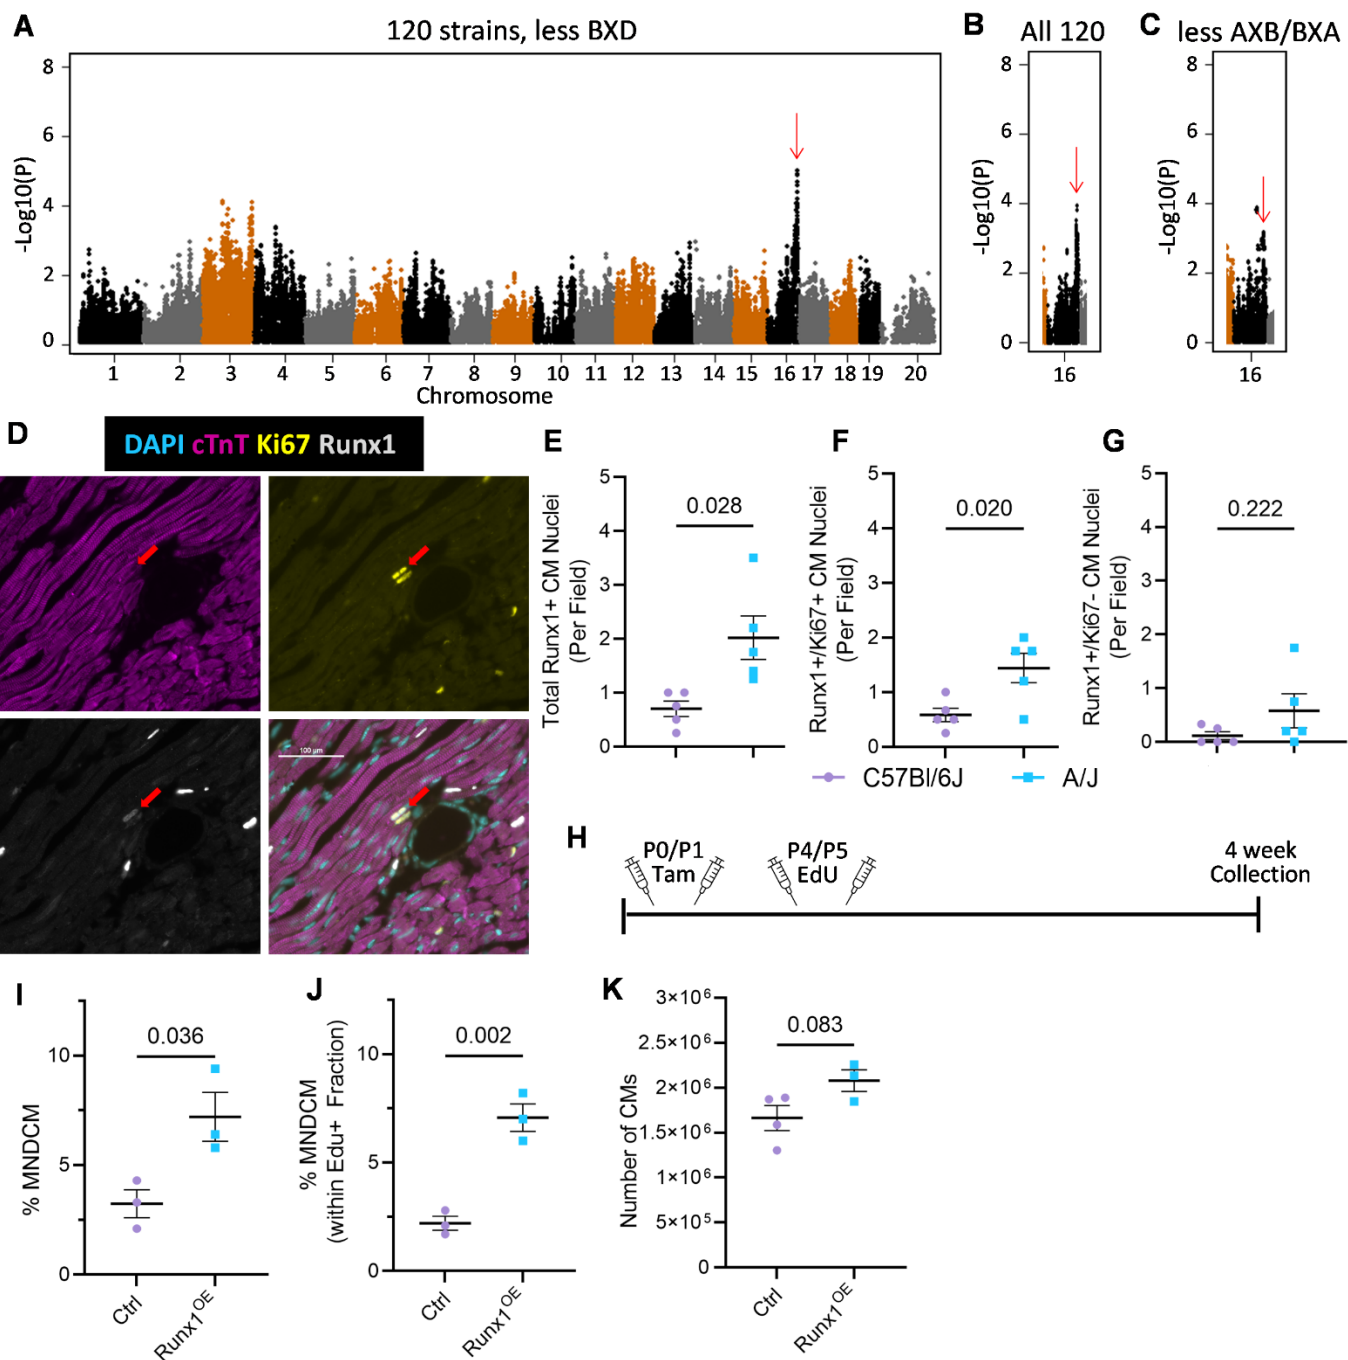

483

484

**Figure 4. Runx1 overexpression in C57Bl/6J is sufficient to induce A/J-like ploidy phenotypes. (A)**

485

Manhattan plot for genome association utilizing phenotypic data collected by (Patterson *et al.*, 2017) after

486

removing the BXD RI panel. **(B)** Manhattan plot for genomic association within Chr16 with all 120 strains

487

included. **(C)** Manhattan plot for genomic association within Chr16 after removing the AXB/BXA RI panel. **(D)**

488

Representative fluorescent image of a Runx1 (greyscale), Ki67 (yellow), cTnT (magenta), and DAPI (cyan).

489

Red arrowhead points to a Runx1, Ki67-double positive cardiomyocyte. Scale bar = 100uM. **(E)** Quantification

490

of percentage of Runx1-positive cardiomyocyte nuclei per 20x field. All pictures were taken in the left ventricle

491 at P21 comparing C57Bl/6J to A/J **(F)** Quantification of Runx1, Ki67-double positive cardiomyocyte nuclei per  
492 20x field. **(G)** Quantification of Runx1-positive, Ki67-negative cardiomyocyte nuclei per field. **(H)** Timeline  
493 depicting tamoxifen and EdU injections as well as collection timepoints for Runx1 OE Experiments 1 (Exp 1,  
494 top) & 2 (Exp 2, bottom). **(I)** Percent MNDCM at 4 weeks of age across *Runx1* OE and Cre-positive control  
495 (Ctrl) littermates following Exp 1 injection protocol. **(J)** Quantification of Edu-positive MNDCM as a percent of  
496 total EdU-positive cardiomyocytes following Exp 1 injection protocol. **(K)** Quantification of total cardiomyocyte  
497 number by hemocytometer following Exp 1 injection protocol.



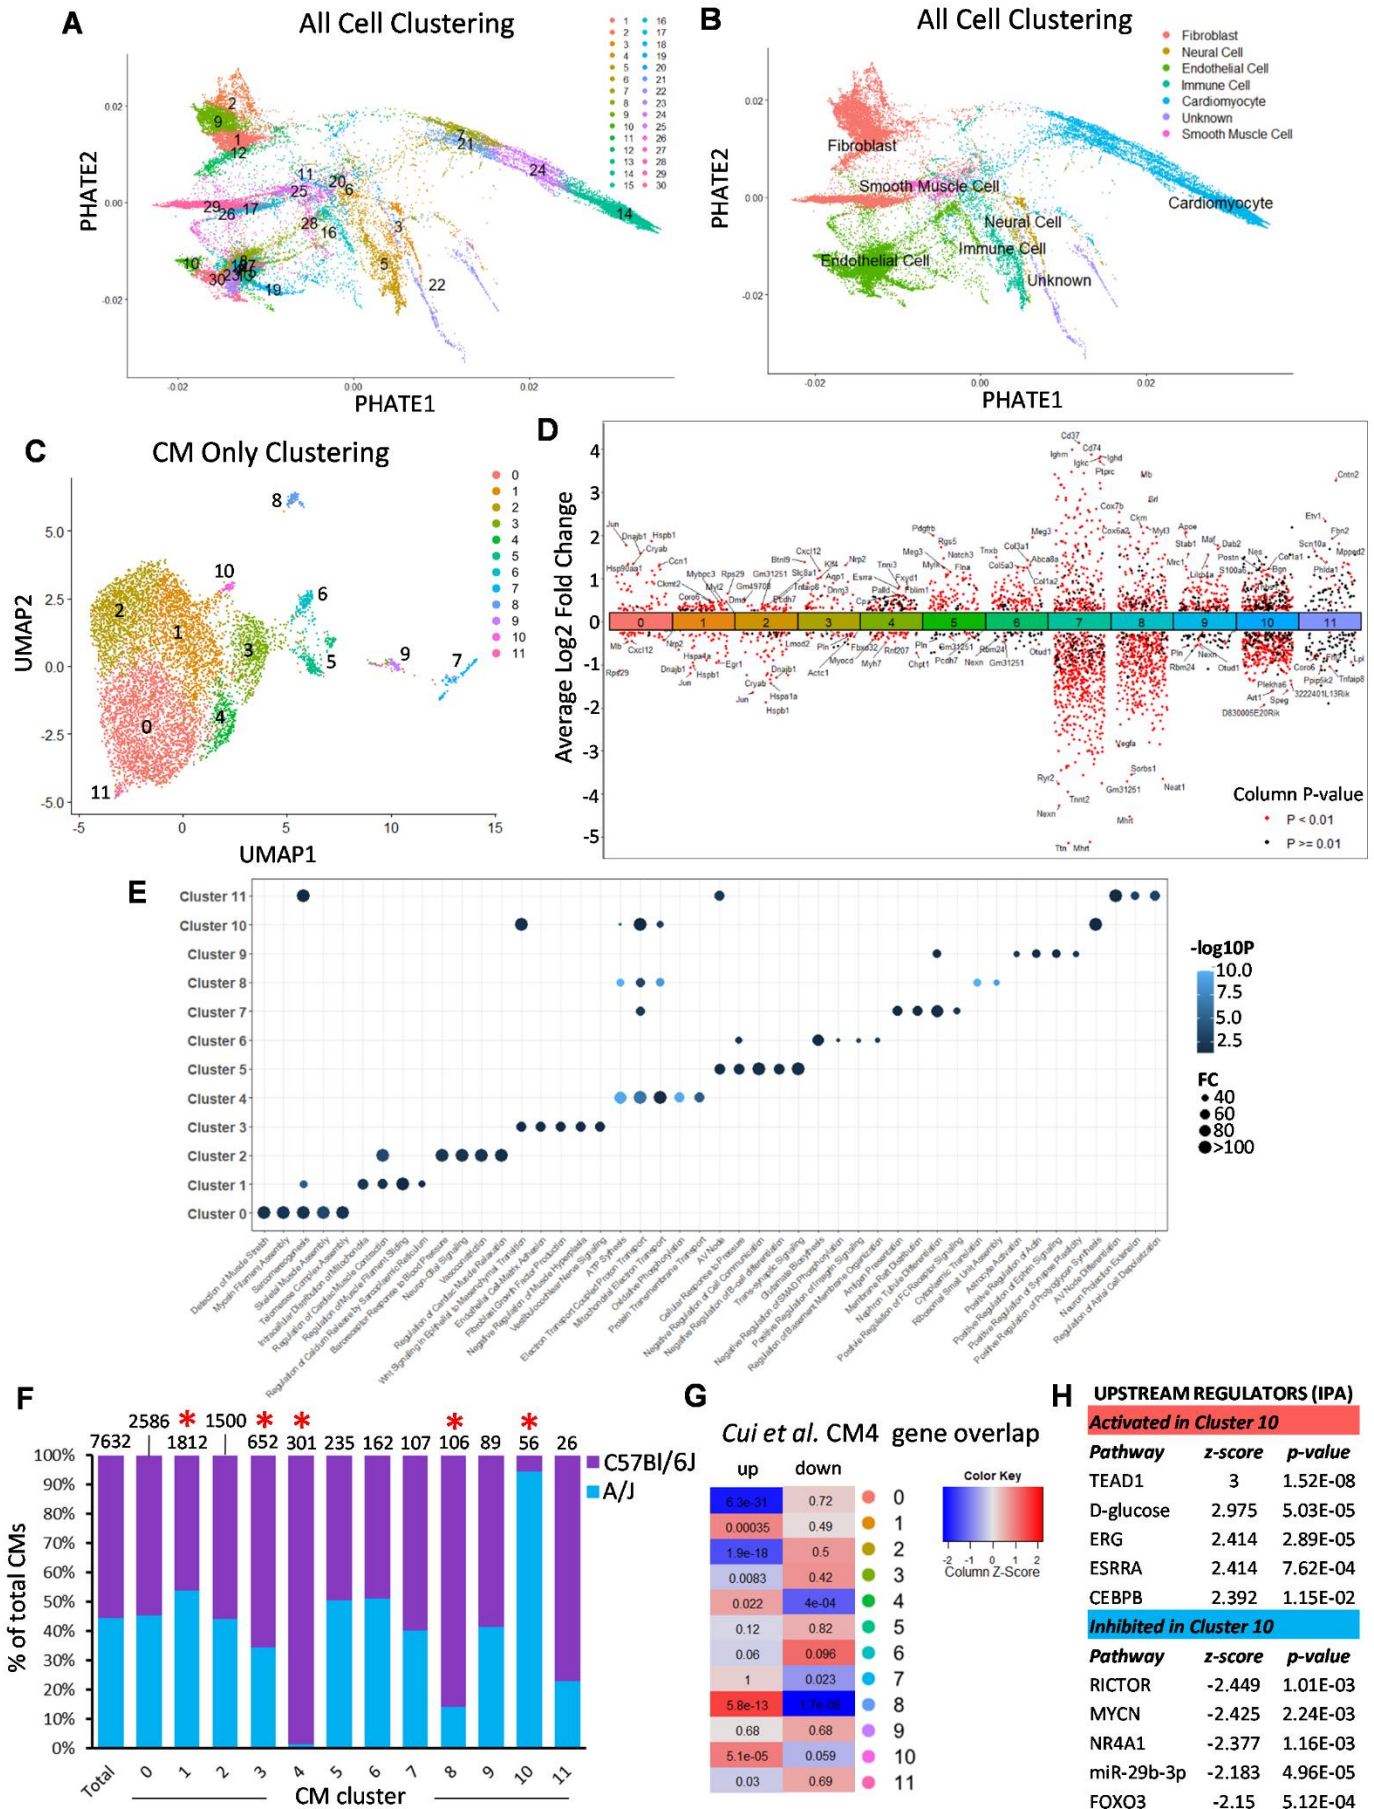

**Figure 5. Single nucleus RNA sequencing identifies a unique cardiomyocyte subpopulation in A/J**

**hearts. (A)** Potential of Heat-diffusion for Affinity-based transition Embedding (PHATE) Dimplot of all 56,661 nuclei isolated from P21 A/J and C57Bl/6 hearts. **(B)** PHATE Dimplot identifying likely cell identifiers as

determined by cellKb. **(C)** 7,632 nuclei from Clusters 7, 14, 21, and 24 from parent clustering plot reclustered

by Uniformed Manifold Approximation Projection (UMAP) following doublet removal. **(D)** Dot plot of the

uniquely upregulated and downregulated genes for each of the 12 cardiomyocyte clusters relative to other

clusters.  $P < 0.01$  (red),  $P \geq 0.01$  (black). **(E)** Top 5 Gene Ontology Terms represented by the upregulated gene

lists for each cluster ( $P < 0.01$  and X Fold change). **(F)** Break down of number of A/J and C57Bl/6J nuclei

represented in each cardiomyocyte cluster. Total number of nuclei for each cluster listed above bar. \* indicates

statistical deviation from the expected distribution ( $P < 0.05$  following Bonferroni correction) **(G)** Heatmap

indicating the overlap of genes expressed by each cluster with the genes up and down regulated in Cui et al.

(2020) CM4 cluster. Z-score normalized to column. **(H)** Top 5 activated and inhibited pathways identified by

IPA upstream regulator analysis on the genes that define cluster 10.

**STAR★METHODS**

*Mice*

All animal experiments were approved by and performed in accordance with the Institutional Animal Care and Use Committee of the Medical College of Wisconsin. A/J (JAX stock #000646) and C57Bl/6J (JAX stock #000664) mice were either purchased from Jackson Laboratory, Bar Harbor, Maine and allowed to acclimate for at least one week prior to experimental start or were bred inhouse from breeders originally purchased from Jackson Laboratory. *Tnni3k* global knockout mice were generated as described in (Patterson *et al.*, 2017), *Gt(Rosa)26<sup>tm1(RUNX1)M $\alpha$</sup>*  mice (Qi *et al.*, 2017; Yzaguirre *et al.*, 2018) were obtained from the Speck Laboratory at University of Pennsylvania, and *Myh6-MerCreMer* (JAX Stock 011038) mice were obtained from JAX Laboratory. All three alleles have been backcrossed and maintained at least 8 generations on a C57Bl/6J background by our laboratory. For all timed experiments, birth (postnatal day 0, P0) was assumed to have taken place at 12:00 AM. Only litters with 3-8 pups were used; and runts were excluded from any analysis. All experiments include a mix of virgin males and females, although sex was not determined for neonates <P21. In experiments where a mix of the sexes were used, no phenotypic differences between the sexes were

527 observed. Animals were housed as compatible pairs or groups in ventilated cages on 12-hour light/dark cycles  
528 with *ad libitum* access to water and food. Euthanasia was performed in accordance with the recommendations  
529 of the American Veterinary Medical Association. Neonates  $\leq$ P14 were decapitated with surgical scissors, while  
530 animals  $\geq$ P21 underwent cervical dislocation following isoflurane-induced anesthesia.

### 532 *EdU Administration*

533 5-ethynyl-2'-deoxyuridine (EdU, Thermo Fisher, E10187) was resuspended in DMSO at 100mg/mL to  
534 create a stock solution, which was aliquoted and stored at -20°C for no longer than 3 months. A fresh, never  
535 thawed aliquot of stock solution was further diluted to 1mg/mL with sterile PBS no more than 30-minutes prior  
536 to administration. Mice were injected once per day by intraperitoneal (i.p.) injection at 10mg/kg. Animals were  
537 euthanized at time indicated. For a complete list of administration methods broken down by experiment, please  
538 see Table 1.

| <b>Figure</b>    | <b>Age, at injection(s)</b> | <b>Administration method</b> | <b>Age, at euthanasia</b> |
|------------------|-----------------------------|------------------------------|---------------------------|
| Figure 1F        | P4                          | Single i.p. injection        | P5                        |
| Figure 1F        | P7                          | Single i.p. injection        | P8                        |
| Figure 1F        | P10                         | Single i.p. injection        | P11                       |
| Figure 1F        | P21-24                      | i.p. injection, once per day | P25                       |
| Figure 1F        | P25-28                      | i.p. injection, once per day | P29                       |
| Figure 2D        | P14-20                      | i.p. injection, once per day | P21                       |
| Figures 2E-F     | P14-20                      | i.p. injection, once per day | P21 or 6 weeks            |
| Supp Figure 2B-C | P4 and P5                   | i.p. injection, once per day | P21 or 4 weeks            |
| Supp Figure 2B-C | P8, 10, and 12              | i.p. injection, once per day | P21 or 4 weeks            |
| Figure 3C        | P14-20                      | i.p. injection, once per day | P21                       |
| Figure 3D        | P14-20                      | i.p. injection, once per day | P21 or 6 weeks            |
| Figure 4I        | P4 and P5                   | i.p. injection, once per day | 4 weeks                   |
| Figure 4L        | P4 and P5                   | i.p. injection, once per day | 4 weeks                   |

### 540 *Single cell ventricular suspensions*

541 Hearts were extracted from euthanized mice by cutting the aorta just below the arch arteries, along with  
542 the other major vessels. Isolated hearts were washed in ice cold Kruffbruehe (KB) solution and secured by their  
543 aortas to a cannula of varying sizes (see Table 2) then tied off with a 3-0 silk suture. Atria were removed with  
544 Vannas micro spring scissors. Cannulated ventricles were then hung from a Langendorff apparatus and  
545 perfused with calcium-free Tyrodes buffer, followed by 1 mg/mL collagenase type II (Thermo Fisher,  
546 17101015) dissolved in calcium-free Tyrodes buffer. Both solutions were warmed to 37°C. Volume of

collagenase solution, along with size of cannula, varied by age of mouse (see Table 2 for details). Following perfusion, ventricular tissue was diced with dissection scissors, triturated in ice cold Kruffbrühe (KB) solution using a wide bore 1mL pipette, filtered through a 250 $\mu$ m mesh, and fixed by adding equal volume of 8% ice cold PFA and letting stand at room temperature (RT) for 10 minutes (final concentration of PFA = 4%). Filtering through the 250 $\mu$ m mesh was not used when assessing cardiomyocyte number. Following fixation, cell suspensions were spun down at 300G for 2 minutes and resuspended in PBS.

| Age of mouse  | Cannula size   | Volume of collagenase (1mg/ml) |
|---------------|----------------|--------------------------------|
| P1            | 27 gauge       | 15-20 mL                       |
| P4-9          | 27 or 22 gauge | 20-25 mL                       |
| P10-20        | 22 or 20 gauge | 25 mL                          |
| P21 and older | 20 or 18 gauge | 25-50 mL                       |

#### *Quantification of total cardiomyocyte numbers*

Fixed unfiltered cells resultant from a whole heart (less atria) Langendorff digestion, were resuspended in 2 mL of PBS. While fully resuspended, a 20 $\mu$ l aliquot was drawn up with a 100  $\mu$ l pipette and diluted 1:5 in PBS. This was repeated three separate times for each heart. Each of the three aliquots was counted in triplicate on a hemocytometer. Cardiomyocytes were distinguished from non-cardiomyocytes by size and morphology. All counts (9 in total) were averaged together to come up with the best possible estimate of total cardiomyocyte numbers. A two-way ANOVA with multiple comparisons (age and strain being the two dependent variables) and Tukey posthoc test were run to calculate the statistical significance of any inter- and intra-strain differences.

#### *Immunostain for single cell suspensions*

Fixed ventricular cell suspensions were blocked with 10% normal goat serum (NGS, Thermo Fisher, catalog # 50062Z) and .01% triton X-100 for 1 hour at RT. Cells were incubated with primary antibody for either mouse anti-cTnT (1:500, Abcam ab8295), mouse anti-Actn2 (1:500, Sigma A7811), or rabbit anti-Pcm1 (1:400, Sigma Aldrich HPA023370) in blocking solution overnight at 4 °C. Cells were then washed twice in PBS with spins at 300G for 3 mins in between and incubated with Alexa Fluor 488 goat anti-mouse secondary (1:500, Thermo Fisher, A11029) in PBS for one hour at RT. During the last ten minutes of secondary incubation 4',6-

572 diamidino-2-phenylindole (DAPI 1mg/mL, 1:1000) was added to the suspensions. Cells were washed two times  
573 in diH<sub>2</sub>O and spun one final time. Cells from the final pellet were resuspended with Prolong Gold (Thermo  
574 Fisher, P26930), pipetted across a slide and cover slipped.

575 In the case of “cytokinesis” experiments as described by Figure 2A, cell suspensions were also stained  
576 with a Click-it EdU kit Alexa Fluor 555 (Thermo Fisher, C10339) according to the manufacturer’s protocol. This  
577 was performed after blocking and primary antibody but prior to addition of secondary antibody. The entire pellet  
578 was pipetted across slides at a density of ~15µL of pelleted cells per slide mixed with 20µL of Prolong Gold  
579 (Thermo Fisher P26930) and cover slipped.

### 581 *Ploidy analysis*

582 Following staining, cardiomyocyte nucleation was quantified on a Nikon Eclipse 80i fluorescent  
583 microscope with a 20x objective. 300 healthy cardiomyocytes were counted for their nucleation (i.e. mono- bi-  
584 tri- or tetranucleated); cardiomyocytes with a spherical shape or frayed edges (accounting for less than 5% of  
585 any preparation) were excluded for being dead or dying. Additionally, fluorescent images were taken at 10x  
586 magnification with a Panda PCO camera and analyzed on NIS Elements software. For each animal, the nuclei  
587 from ~500 cells were evaluated for nuclear ploidy by calculating the sum DAPI intensity of each nucleus and  
588 normalizing it to a known 2N population, typically Tri and Tetranucleated cardiomyocytes. Nuclear ploidy was  
589 calculated separately for each nucleation class and the two independent measurements were combined to  
590 estimate the frequency of each ploidy class (i.e. 1x2N, 1x4N, 1x8N, 1x16N, 2x2N, 2x4N, 2x8N, Tri – 2x2N +  
591 1x4N or 2x4N + 1x8N, and Tetra – 4x2N or 4x4N) represented as a percent of total. Because all ploidy  
592 subpopulations add up to 100% and are therefore interdependent on one another, a multivariate ANOVA with  
593 LSD posthoc test was used to compare inter- and intra-strain differences.

594 An estimate of total number of cardiomyocytes for each ploidy class, as in Figure 2G was calculated by  
595 multiplying the ploidy class percentages of each individual by the average of total cardiomyocyte number at  
596 each specific timepoint. Changes in cardiomyocyte numbers, as in Figure 2H, were calculated by subtracting  
597 the estimated total of a given ploidy class at 3 weeks from the estimated total of the same ploidy class at 4  
598 weeks. Statistical significance in Figure 2H was assessed by multivariate ANOVA comparing 3- and 4-week  
599 timepoints.

600

601 *Cytokinesis analysis by single cell suspension*

602 As with ploidy analysis, slides were scanned in their entirety on a Nikon Eclipse 80i fluorescent  
603 microscope with a 20x objective until at least 175 EdU-positive cardiomyocytes were counted for their  
604 nucleation. Total percentages of EdU-positive cardiomyocytes in the heart were estimated using the number of  
605 EdU-positive cardiomyocytes found on a single slide multiplied by the number of slides generated following  
606 staining and divided by the total number of cardiomyocytes quantified by hemocytometer for that same animal.  
607 While scanning, images of EdU-positive cardiomyocytes pictures were taken at 10x. EdU-positive  
608 cardiomyocyte nuclei were analyzed in NIS elements for DAPI intensity and normalized to a known 2N nucleus  
609 as above. At least 25 mononucleated cardiomyocytes were analyzed for each animal. A two-way ANOVA with  
610 multiple comparisons was run to show inter and intra strain differences.

611

612 *Histology*

613 As above, hearts were dissected from euthanized mice, washed in KB solution until no longer beating,  
614 and hung on a Langendorff apparatus. Hung hearts were first perfused retroaortically with 5 mL of calcium-free  
615 Tyrodes to flush out any remaining blood, followed by 5 mL of ice cold 4% PFA and then further fixed in 4%  
616 PFA overnight at 4 °C (~12-18 hours). After washing three times in PBS, hearts were stored in 70% ethanol  
617 until further processing could take place. Briefly, hearts were dehydrated by progressive introduction of ethanol  
618 (80%, 90%, 100%) and cleared with xylene prior to being embedded in paraffin wax. Embedded tissues were  
619 sectioned from apex to outflow track (2-chamber view) on a Thermo Microm HM 355S microtome at 4µm  
620 thickness. Tissues were collected every 200-400 µm depending on the age of the animal/size of the heart.

621

622 *In situ fluorescence*

623 Tissue sections were rehydrated by sequential introduction to ethanol solutions for 2 minutes each  
624 (Xylene, 100%, 90%, 80%, 70%, H<sub>2</sub>O) and heated at 100°C in Sodium Citrate buffer with 0.1% Triton-X-100  
625 and .05% Tween-20, pH 6.0 for 30 minutes for antigen retrieval. After washing in PBS, slides were blocked  
626 with 5% normal donkey serum (NDS, Jackson ImmunoResearch 017-000-121) and 5% bovine serum albumin  
627 (BSA, VWR 97061-420) in PBS for 1 hour at RT. Primary antibodies, goat anti-NKX2.5 (1:250, Abcam

628 ab106923), mouse anti-cTnT (1:500, Abcam ab8295), rabbit anti-Runx (1:250, Abcam ab209838), and/or rat  
629 anti-Ki67 (1:250, Invitrogen 14-5698-82) were diluted in blocking buffer and incubated on tissue sections at 37  
630 °C for two hours in a humid chamber. Slides were washed in PBS and incubated with secondary antibodies  
631 Alexa Fluor donkey anti-goat 555 (Thermo Fisher A32816), donkey anti-mouse 647 (Thermo Fisher, A31571),  
632 donkey anti-rabbit 555 (Thermo Fisher A31572), or donkey anti-rat 488 (Abcam ab150153) respectively,  
633 diluted in PBS for one hour RT. Slides were washed in PBS and EdU incorporation was labeled using Click-it  
634 EdU Alexa Fluor 488 kit (Thermo Fisher, C10339) according to manufacturer's protocol. After washing in PBS,  
635 tissues were incubated with 0.03% Sudan black B (SBB) dissolved in 70% ethanol for 20 minutes at RT  
636 followed by a PBS wash. DAPI was labeled using 10ug/ml in PBS for 5 mins at RT, followed by PBS wash.  
637 Slides were cover slipped using Prolong Gold (Thermo Fisher, P26930) and allowed to dry in the dark. Pictures  
638 were taken with a PCO Panda camera using a 20x objective on a Nikon Eclipse 80i fluorescence microscope.  
639 ~6 pictures were taken per animal in randomly selected regions throughout the left ventricle and the septum  
640 (equal representation of each). EdU-positive Nkx2.5-positive cardiomyocyte nuclei were quantified as a  
641 percent of total Nkx2.5-positive cardiomyocyte nuclei using NIS Elements software. Runx1 and Ki67 positive  
642 cardiomyocyte nuclei were identified by intersection with cTnT and represented as positive nuclei per region. A  
643 student's T-test was run between strains at each time point or between strains at a single time point.

644

#### 645 *Nuclear isolation for single nucleus RNA sequencing*

646 On two occasions for each strain, hearts were excised from 3 littermates collected at P21. If 2 females  
647 and 1 male were used for the first collection, then the reverse was done on the second collection, such that the  
648 final sequencing represents 6 hearts, 3 males and 3 females. Excised hearts, with atria removed, were  
649 Langendorff perfused with 25 mLs of 1mg/mL collagenase as described above. Digested hearts were  
650 resuspended in ice cold KB and allowed to settle for 10 minutes on ice. We had hoped this would enrich for  
651 cardiomyocytes which are larger and heavier than other cell types, though it did not seem to help. Following 10  
652 minute incubation, the supernatant was removed and the loose pellet was resuspended in 5mL of Lysis buffer  
653 prepared as described in (Cui and Olson, 2020) with only one adjustment – 50ul of 10% Triton-X-100 was  
654 added (final concentration 0.1%). Cells were incubated in Lysis buffer + Triton for 5 minutes on ice, after which  
655 they were homogenized with a Tissue Tearor electric tissue homogenizer (Model # 985370) at the second

656 lowest setting for 20-30 seconds, and left to sit again for another 5 minutes on ice. They were then transferred  
657 through a 15mL glass dounce homogenizer and further homogenized with 20 strokes of the A pestle and 20  
658 strokes of the B pestle. Homogenized cell suspensions were sequentially filtered through a 70uM, 40um, and  
659 20um cell strainer to removed debris and undigested materials. Samples were then spun at 1000 G for 5  
660 minutes and resuspended in 1mL of 2% BSA dissolved in d-PBS with RNaseOut (Invitrogen, 200U/mL). A  
661 small aliquot was set aside to serve as an unstained control for fluorescent activated cell sorting (FACS). The  
662 remainder of the suspension was stained with DAPI at 10ug/ml for 5 minutes on ice. Samples were spun at  
663 1000G for 5 minutes and resuspended in fresh 2% BSA-RNaseOut solution.

664 Following staining, nuclei were sorted on a BD FACSMelody at 4°C. Following standard protocols,  
665 forward and side scatters were used to remove doublets. Unstained controls were used to set the V450 gate.  
666 432,000 nuclei were collected into a 2mL centrifuge tube preloaded with 500uL of 2% BSA-RNaseOut solution.  
667 Sorted nuclei were spun down at 1000G for 5 minutes, supernatant was removed, and samples were  
668 resuspended in 100uL of 2% BSA-RNaseOut solution before proceeding to 10x library preparation.

#### 669 *10xGenomics cDNA and library preparation of nuclear samples*

670 Sorted nuclei resuspended in a solution of D-PBS with 2% BSA solution and RNaseout (Invitrogen).  
671 Nuclei were quantified with a Luna FI cell counter (Logos Biosystems) and the volume was adjusted to obtain  
672 the ideal concentration of nuclei recommended by 10x Genomics (1000 nuclei/ $\mu$ L). Individual nuclei were  
673 paired with Chromium v3.1 gel beads and cDNA synthesis, barcoding, and dual index library preparation was  
674 performed using Chromium Next GEM V3.1 chemistry according to the manufacturer's recommendation (10x  
675 Genomics). 10,000 nuclei were targeted for each sample with 13 cycles for cDNA amplification and 13 cycles  
676 for sample index PCR. The fragment size of cDNA and libraries was assessed using Agilent's 5200 Fragment  
677 Analyzer System to verify product quality prior to sequencing.

#### 679 *Sequencing*

680 4 libraries were sequenced at the Roy J. Carver Biotechnology Center at the University of Illinois,  
681 Urbana Champaign on a NovaSeq 6000 using one S4 lane with 2X150nt reads. Samples were demultiplexed



683 and mapped to the mm10 genome using Cell Ranger v6.1.1 (10X Genomics). These data are accessible at  
684 BioProject using the ID PRJNA880279 in the Sequence Read Archive.

### 685 686 *Single nuclear RNA sequencing analysis*

687 Each library was preprocessed using the Seurat 4.1.0 R package (Hao *et al.*, 2021) to retain nuclei with  
688 unique feature counts between 200 and 2,500 and with fewer than 2% mitochondrial counts. The four libraries  
689 were then integrated into a single Seurat object using the Seurat functions `FindIntegrationAnchors` and  
690 `IntergrateData`, as previously described (Hao *et al.*, 2021). Briefly, the functions act to perform batch correction  
691 on the data by identifying transformation vectors based on integration ‘anchors’ that show strong local  
692 ‘neighborhood’ correlation with similar cells, but a broad diversity of expression across the entire dataset. The  
693 functions leverage that information to merge cell clusters between samples together into an integrated whole.  
694 Doublets were identified and removed using `DoubletFinder 2.0` (McGinnis *et al.*, 2019), which generates  
695 artificial doublets from Seurat-processed clusters, inserts them into the original dataset and then identifies  
696 likely true doublets by identified cells with high correlation to numerous artificial doublets. Cell clustering was  
697 then performed using `PHATEr (1.0.7)` (Moon *et al.*, 2019) and differentially expressed features identified using  
698 the `FindAllMarkers` function in Seurat. Differentially expressed genes were examined using `cellKb 2.2.1`  
699 (*Biorxiv*: <https://doi.org/10.1101/2020.12.01.389890>) which compares the marker genes with nearly 40k marker  
700 gene sets representing 2,742 unique cell types across 10 species, by *Tabula Muris* (Tabula Muris *et al.*, 2018),  
701 and cardiomyocyte-enriched clusters were separated for further analysis.

702 Cardiomyocyte clusters were re-clustered using the standard Seurat PCA-based pipeline and mapped  
703 with the UMAP projection. Differentially expressed genes were identified using the `FindAllMarkers` function as  
704 above, and gene ontology enrichments performed using Panther version 17.0 (Thomas *et al.*, 2022) for both  
705 differentially expressed (FDR-adjusted  $P < 0.01$ , absolute value of fold change  $> 1.25$ ) and highly expressed  
706 (FDR-adjusted  $P < 0.01$ , fold change  $> 1.5$ ) genes in each cluster. Cell Cycle identity for each cell was  
707 determined using the tricycle transfer learning algorithm (1.2.1, (Zheng *et al.*, 2022)) as described in the  
708 manuscript and enrichment of clusters for cells within the cell cycle determined by chi-squared testing.

709 Finally, the identifying genes from (Cui *et al.*, 2020) CM4 were split into up- and down-regulated gene  
710 sets (absolute value of  $\log_2$  fold change  $> 0.5$  and FDR-corrected p-value  $< 0.001$ ) and enrichment or

711 depletion across the cardiomyocyte clusters was determined by Wilcoxon Man Whitney Correlation Corrected  
712 GSEA as implemented in the singleseqset R package (0.1.2.9,  
713 <https://arc85.github.io/singleseqset/index.html>).

#### 714 715 *Genome-wide association study*

716 Phenotypes from 120 inbred mouse strains for the HMDP were taken from (Patterson *et al.*, 2017).  
717 Averages for each strain underwent arcsin transformation to normalize the distribution of the data. Association  
718 testing was conducted on either 120 strains less the 44 strains of the BXD panel or on the 120 strains less the  
719 27 strains of the AXB/BXA panel. Association testing of each single nucleotide polymorphism was performed in  
720 R software package as described in (Rau *et al.*, 2015).

#### 721 722 *Epigenome-wide association study*

723 The data for this portion of the study comes from the control mice of a prior HMDP studying heart  
724 failure (Lahue, 2022; Rau *et al.*, 2015). Briefly, DNA was isolated from left ventricles of 92 strains and  
725 sequenced using reduced representational bisulfite sequencing. DNA methylation was called using  
726 BSSeeker2 (Guo *et al.*, 2013) using the mm10 genome build. Hypervariable CpGs were identified as CpGs  
727 which showed greater than 25% methylation variability in at least 10% of the studied strains as previously  
728 described (PMC4454894). Phenotypes were taken from (Patterson *et al.*, 2017) as described above. EWAS  
729 was performed using the MACAU algorithm (Lea *et al.*, 2015). Locus-wide significance was determined using  
730 the benjamini-hochberg correction. Locus boundaries were determined as previously described (Orozco *et al.*,  
731 2015).

#### 732 733 SUPPLEMENTAL INFORMATION

734 Please find Supplemental Tables 1 and 2, and Supplemental Figures 1-5 attached. Sequencing data  
735 have been uploaded to BioProject database (BioProject ID PRJNA880279).

736  
737  
738

739 REFERENCES

- 740 Adzhubei, I.A., Schmidt, S., Peshkin, L., Ramensky, V.E., Gerasimova, A., Bork, P., Kondrashov, A.S., and  
741 Sunyaev, S.R. (2010). A method and server for predicting damaging missense mutations. *Nat Methods* 7, 248-  
742 249.
- 743 Ali, S.R., Hippenmeyer, S., Saadat, L.V., Luo, L., Weissman, I.L., and Ardehali, R. (2014). Existing  
744 cardiomyocytes generate cardiomyocytes at a low rate after birth in mice. *Proc Natl Acad Sci U S A* 111, 8850-  
745 8855.
- 746 Alkass, K., Panula, J., Westman, M., Wu, T.D., Guerquin-Kern, J.L., and Bergmann, O. (2015). No Evidence  
747 for Cardiomyocyte Number Expansion in Preadolescent Mice. *Cell* 163, 1026-1036.
- 748 Auchampach, J., Han, L., Huang, G.N., Kuhn, B., Lough, J.W., O'Meara, C.C., Payumo, A.Y., Rosenthal, N.A.,  
749 Sucov, H.M., Yutzey, K.E., and Patterson, M. (2022). Measuring cardiomyocyte cell-cycle activity and  
750 proliferation in the age of heart regeneration. *Am J Physiol Heart Circ Physiol* 322, H579-H596.
- 751 Beltrami, C.A., Di Loreto, C., Finato, N., and Yan, S.M. (1997). DNA Content in End-Stage Heart Failure. *Adv*  
752 *Clin Path* 1, 59-73.
- 753 Bostrom, P., Mann, N., Wu, J., Quintero, P.A., Plovie, E.R., Panakova, D., Gupta, R.K., Xiao, C., MacRae,  
754 C.A., Rosenzweig, A., and Spiegelman, B.M. (2010). C/EBPbeta controls exercise-induced cardiac growth and  
755 protects against pathological cardiac remodeling. *Cell* 143, 1072-1083.
- 756 Bradley, L.A., Young, A., Li, H., Billcheck, H.O., and Wolf, M.J. (2021). Loss of Endogenously Cycling Adult  
757 Cardiomyocytes Worsens Myocardial Function. *Circ Res* 128, 155-168.
- 758 Brodsky, V., Sarkisov, D.S., Arefyeva, A.M., Panova, N.W., and Gvasava, I.G. (1994). Polyploidy in cardiac  
759 myocytes of normal and hypertrophic human hearts; range of values. *Virchows Arch* 424, 429-435.
- 760 Chuang, L.S.H., and Ito, Y. (2021). The Multiple Interactions of RUNX with the Hippo-YAP Pathway. *Cells* 10.  
761 Cui, M., and Olson, E.N. (2020). Protocol for Single-Nucleus Transcriptomics of Diploid and Tetraploid  
762 Cardiomyocytes in Murine Hearts. *STAR Protoc* 1, 100049.
- 763 Cui, M., Wang, Z., Chen, K., Shah, A.M., Tan, W., Duan, L., Sanchez-Ortiz, E., Li, H., Xu, L., Liu, N., et al.  
764 (2020). Dynamic Transcriptional Responses to Injury of Regenerative and Non-regenerative Cardiomyocytes  
765 Revealed by Single-Nucleus RNA Sequencing. *Dev Cell* 55, 665-667.
- 766 D'Uva, G., Aharonov, A., Lauriola, M., Kain, D., Yahalom-Ronen, Y., Carvalho, S., Weisinger, K., Bassat, E.,  
767 Rajchman, D., Yifa, O., et al. (2015). ERBB2 triggers mammalian heart regeneration by promoting  
768 cardiomyocyte dedifferentiation and proliferation. *Nat Cell Biol* 17, 627-638.
- 769 Duncan, A.W. (2013). Aneuploidy, polyploidy and ploidy reversal in the liver. *Semin Cell Dev Biol* 24, 347-356.
- 770 Duncan, A.W., Taylor, M.H., Hickey, R.D., Hanlon Newell, A.E., Lenzi, M.L., Olson, S.B., Finegold, M.J., and  
771 Grompe, M. (2010). The ploidy conveyor of mature hepatocytes as a source of genetic variation. *Nature* 467,  
772 707-710.
- 773 Engel, F.B., Schebesta, M., and Keating, M.T. (2006). Anillin localization defect in cardiomyocyte binucleation.  
774 *J Mol Cell Cardiol* 41, 601-612.
- 775 Flinn, M.A., Link, B.A., and O'Meara, C.C. (2020). Upstream regulation of the Hippo-Yap pathway in  
776 cardiomyocyte regeneration. *Semin Cell Dev Biol* 100, 11-19.
- 777 Gan, P., Baicu, C., Watanabe, H., Wang, K., Tao, G., Judge, D.P., Zile, M.R., Makita, T., Mukherjee, R., and  
778 Sucov, H.M. (2021). The prevalent I686T human variant and loss-of-function mutations in the cardiomyocyte-  
779 specific kinase gene TNNI3K cause adverse contractility and concentric remodeling in mice. *Hum Mol Genet*  
780 29, 3504-3515.
- 781 Gan, P., Patterson, M., and Sucov, H.M. (2020). Cardiomyocyte Polyploidy and Implications for Heart  
782 Regeneration. *Annu Rev Physiol* 82, 45-61.
- 783 Gan, P., Patterson, M., Velasquez, A., Wang, K., Tian, D., Windle, J.J., Tao, G., Judge, D.P., Makita, T., Park,  
784 T.J., and Sucov, H.M. (2019). Tnni3k alleles influence ventricular mononuclear diploid cardiomyocyte  
785 frequency. *PLoS Genet* 15, e1008354.

- 786 Gilmour, J., Assi, S.A., Noailles, L., Lichtinger, M., Obier, N., and Bonifer, C. (2018). The Co-operation of  
787 RUNX1 with LDB1, CDK9 and BRD4 Drives Transcription Factor Complex Relocation During Haematopoietic  
788 Specification. *Sci Rep* 8, 10410.
- 789 Gilsbach, R., Schwaderer, M., Preissl, S., Gruning, B.A., Kranzhofer, D., Schneider, P., Nuhrenberg, T.G.,  
790 Mulero-Navarro, S., Weichenhan, D., Braun, C., et al. (2018). Distinct epigenetic programs regulate cardiac  
791 myocyte development and disease in the human heart in vivo. *Nat Commun* 9, 391.
- 792 Gonzalez-Rosa, J.M., Sharpe, M., Field, D., Soonpaa, M.H., Field, L.J., Burns, C.E., and Burns, C.G. (2018).  
793 Myocardial Polyploidization Creates a Barrier to Heart Regeneration in Zebrafish. *Dev Cell* 44, 433-446 e437.
- 794 Guo, W., Fiziev, P., Yan, W., Cokus, S., Sun, X., Zhang, M.Q., Chen, P.Y., and Pellegrini, M. (2013). BS-  
795 Seeker2: a versatile aligning pipeline for bisulfite sequencing data. *BMC Genomics* 14, 774.
- 796 Han, L., Choudhury, S., Mich-Basso, J.D., Ammanamanchi, N., Ganapathy, B., Suresh, S., Khaladkar, M.,  
797 Singh, J., Maehr, R., Zuppo, D.A., et al. (2020). Lamin B2 Levels Regulate Polyploidization of Cardiomyocyte  
798 Nuclei and Myocardial Regeneration. *Dev Cell* 53, 42-59 e11.
- 799 Hao, Y., Hao, S., Andersen-Nissen, E., Mauck, W.M., 3rd, Zheng, S., Butler, A., Lee, M.J., Wilk, A.J., Darby,  
800 C., Zager, M., et al. (2021). Integrated analysis of multimodal single-cell data. *Cell* 184, 3573-3587 e3529.
- 801 Hirose, K., Payumo, A.Y., Cutie, S., Hoang, A., Zhang, H., Guyot, R., Lunn, D., Bigley, R.B., Yu, H., Wang, J.,  
802 et al. (2019). Evidence for hormonal control of heart regenerative capacity during endothermy acquisition.  
803 *Science* 364, 184-188.
- 804 Kubin, T., Poling, J., Kostin, S., Gajawada, P., Hein, S., Rees, W., Wietelmann, A., Tanaka, M., Lorchner, H.,  
805 Schimanski, S., et al. (2011). Oncostatin M is a major mediator of cardiomyocyte dedifferentiation and  
806 remodeling. *Cell Stem Cell* 9, 420-432.
- 807 Lahue, C.W., E; Tan Lek Wen, W; Gural, B; Chapski, D; Hui San, T; Yiqing, L; Tejo, E; Vondriska, TM; Foo, R;  
808 Wang, Y; Rau C (2022). Epigenome Wide Association Study of Heart Failure Reveals Predictive Markers of  
809 Disease and Progression. *BioRxiv*.
- 810 Lea, A.J., Tung, J., and Zhou, X. (2015). A Flexible, Efficient Binomial Mixed Model for Identifying Differential  
811 DNA Methylation in Bisulfite Sequencing Data. *PLoS Genet* 11, e1005650.
- 812 Leone, M., Musa, G., and Engel, F.B. (2018). Cardiomyocyte binucleation is associated with aberrant mitotic  
813 microtubule distribution, mislocalization of RhoA and IQGAP3, as well as defective actomyosin ring anchorage  
814 and cleavage furrow ingression. *Cardiovasc Res* 114, 1115-1131.
- 815 Lichtinger, M., Ingram, R., Hannah, R., Muller, D., Clarke, D., Assi, S.A., Lie, A.L.M., Noailles, L., Vijayabaskar,  
816 M.S., Wu, M., et al. (2012). RUNX1 reshapes the epigenetic landscape at the onset of haematopoiesis. *EMBO*  
817 *J* 31, 4318-4333.
- 818 Liu, X., Pu, W., He, L., Li, Y., Zhao, H., Li, Y., Liu, K., Huang, X., Weng, W., Wang, Q.D., et al. (2021). Cell  
819 proliferation fate mapping reveals regional cardiomyocyte cell-cycle activity in subendocardial muscle of left  
820 ventricle. *Nat Commun* 12, 5784.
- 821 Martens, J.H., Mandoli, A., Simmer, F., Wierenga, B.J., Saeed, S., Singh, A.A., Altucci, L., Vellenga, E., and  
822 Stunnenberg, H.G. (2012). ERG and FLI1 binding sites demarcate targets for aberrant epigenetic regulation by  
823 AML1-ETO in acute myeloid leukemia. *Blood* 120, 4038-4048.
- 824 McGinnis, C.S., Murrow, L.M., and Gartner, Z.J. (2019). DoubletFinder: Doublet Detection in Single-Cell RNA  
825 Sequencing Data Using Artificial Nearest Neighbors. *Cell Syst* 8, 329-337 e324.
- 826 Mollova, M., Bersell, K., Walsh, S., Savla, J., Das, L.T., Park, S.Y., Silberstein, L.E., Dos Remedios, C.G.,  
827 Graham, D., Colan, S., and Kuhn, B. (2013). Cardiomyocyte proliferation contributes to heart growth in young  
828 humans. *Proc Natl Acad Sci U S A* 110, 1446-1451.
- 829 Monroe, T.O., Hill, M.C., Morikawa, Y., Leach, J.P., Heallen, T., Cao, S., Krijger, P.H.L., de Laat, W., Wehrens,  
830 X.H.T., Rodney, G.G., and Martin, J.F. (2019). YAP Partially Reprograms Chromatin Accessibility to Directly  
831 Induce Adult Cardiogenesis In Vivo. *Dev Cell* 48, 765-779 e767.

- 832 Moon, K.R., van Dijk, D., Wang, Z., Gigante, S., Burkhardt, D.B., Chen, W.S., Yim, K., Elzen, A.V.D., Hirn,  
833 M.J., Coifman, R.R., et al. (2019). Visualizing structure and transitions in high-dimensional biological data. *Nat*  
834 *Biotechnol* 37, 1482-1492.
- 835 Naqvi, N., Li, M., Calvert, J.W., Tejada, T., Lambert, J.P., Wu, J., Kesteven, S.H., Holman, S.R., Matsuda, T.,  
836 Lovelock, J.D., et al. (2014). A proliferative burst during preadolescence establishes the final cardiomyocyte  
837 number. *Cell* 157, 795-807.
- 838 Ng, P.C., and Henikoff, S. (2001). Predicting deleterious amino acid substitutions. *Genome Res* 11, 863-874.
- 839 Orozco, L.D., Morselli, M., Rubbi, L., Guo, W., Go, J., Shi, H., Lopez, D., Furlotte, N.A., Bennett, B.J., Farber,  
840 C.R., et al. (2015). Epigenome-wide association of liver methylation patterns and complex metabolic traits in  
841 mice. *Cell Metab* 21, 905-917.
- 842 Orr-Weaver, T.L. (2015). When bigger is better: the role of polyploidy in organogenesis. *Trends Genet* 31, 307-  
843 315.
- 844 Patterson, M., Barske, L., Van Handel, B., Rau, C.D., Gan, P., Sharma, A., Parikh, S., Denholtz, M., Huang, Y.,  
845 Yamaguchi, Y., et al. (2017). Frequency of mononuclear diploid cardiomyocytes underlies natural variation in  
846 heart regeneration. *Nat Genet*.
- 847 Patterson, M., and Swift, S.K. (2019). Residual Diploidy in Polyploid Tissues: A Cellular State with Enhanced  
848 Proliferative Capacity for Tissue Regeneration? *Stem Cells Dev* 28, 1527-1539.
- 849 Porrello, E.R., Mahmoud, A.I., Simpson, E., Hill, J.A., Richardson, J.A., Olson, E.N., and Sadek, H.A. (2011).  
850 Transient regenerative potential of the neonatal mouse heart. *Science* 331, 1078-1080.
- 851 Qi, L., Huang, C., Wu, X., Tao, Y., Yan, J., Shi, T., Cao, C., Han, L., Qiu, M., Ma, Q., et al. (2017). Hierarchical  
852 Specification of Pruriceptors by Runt-Domain Transcription Factor Runx1. *J Neurosci* 37, 5549-5561.
- 853 Rau, C.D., Parks, B., Wang, Y., Eskin, E., Simecek, P., Churchill, G.A., and Lusis, A.J. (2015). High-Density  
854 Genotypes of Inbred Mouse Strains: Improved Power and Precision of Association Mapping. *G3 (Bethesda)* 5,  
855 2021-2026.
- 856 Soonpaa, M.H., Kim, K.K., Pajak, L., Franklin, M., and Field, L.J. (1996). Cardiomyocyte DNA synthesis and  
857 binucleation during murine development. *Am J Physiol* 271, H2183-2189.
- 858 Soonpaa, M.H., Zebrowski, D.C., Platt, C., Rosenzweig, A., Engel, F.B., and Field, L.J. (2015). Cardiomyocyte  
859 Cell-Cycle Activity during Preadolescence. *Cell* 163, 781-782.
- 860 Tabula Muris, C., Overall, c., Logistical, c., Organ, c., processing, Library, p., sequencing, Computational data,  
861 a., Cell type, a., Writing, g., et al. (2018). Single-cell transcriptomics of 20 mouse organs creates a Tabula  
862 Muris. *Nature* 562, 367-372.
- 863 Thomas, P.D., Ebert, D., Muruganujan, A., Mushayahama, T., Albou, L.P., and Mi, H. (2022). PANTHER:  
864 Making genome-scale phylogenetics accessible to all. *Protein Sci* 31, 8-22.
- 865 Ugarte, G.D., Opazo, T., Leisewitz, F., van Zundert, B., and Montecino, M. (2012). Runx1 and C/EBPbeta  
866 transcription factors directly up-regulate P2X3 gene transcription. *J Cell Physiol* 227, 1645-1652.
- 867 Velayutham, N., Alfieri, C.M., Agnew, E.J., Riggs, K.W., Baker, R.S., Ponny, S.R., Zafar, F., and Yutzey, K.E.  
868 (2020). Cardiomyocyte cell cycling, maturation, and growth by multinucleation in postnatal swine. *J Mol Cell*  
869 *Cardiol* 146, 95-108.
- 870 Walsh, S., Ponten, A., Fleischmann, B.K., and Jovinge, S. (2010). Cardiomyocyte cell cycle control and growth  
871 estimation in vivo--an analysis based on cardiomyocyte nuclei. *Cardiovasc Res* 86, 365-373.
- 872 Wang, J.J., Rau, C., Avetisyan, R., Ren, S., Romay, M.C., Stolin, G., Gong, K.W., Wang, Y., and Lusis, A.J.  
873 (2016). Genetic Dissection of Cardiac Remodeling in an Isoproterenol-Induced Heart Failure Mouse Model.  
874 *PLoS Genet* 12, e1006038.
- 875 Wheeler, F.C., Tang, H., Marks, O.A., Hadnott, T.N., Chu, P.L., Mao, L., Rockman, H.A., and Marchuk, D.A.  
876 (2009). Tnni3k modifies disease progression in murine models of cardiomyopathy. *PLoS Genet* 5, e1000647.
- 877 Yzaguirre, A.D., Howell, E.D., Li, Y., Liu, Z., and Speck, N.A. (2018). Runx1 is sufficient for blood cell formation  
878 from non-hemogenic endothelial cells in vivo only during early embryogenesis. *Development* 145.

879 Zhang, X., Ma, S., Zhang, R., Li, S., Zhu, D., Han, D., Li, X., Li, C., Yan, W., Sun, D., et al. (2016). Oncostatin  
880 M-induced cardiomyocyte dedifferentiation regulates the progression of diabetic cardiomyopathy through B-  
881 Raf/Mek/Erk signaling pathway. *Acta Biochim Biophys Sin (Shanghai)* 48, 257-265.

882 Zheng, S.C., Stein-O'Brien, G., Augustin, J.J., Slosberg, J., Carosso, G.A., Winer, B., Shin, G., Bjornsson,  
883 H.T., Goff, L.A., and Hansen, K.D. (2022). Universal prediction of cell-cycle position using transfer learning.  
884 *Genome Biol* 23, 41.

885
